# Supplementary material for: Urban heat mitigation by green and blue infrastructure: Drivers, effectiveness, and future needs
Source: PubMed Central journal article supplement (PMC10909648; doi:10.1016/j.xinn.2024.100588), 2024-02-07
Supplement: mmc1.pdf [file mmc1.pdf]

## Supplemental Information

### Urban heat mitigation by green and blue infrastructure: Drivers, effectiveness, and future needs

Prashant Kumar, Sisay E. Debele, Soheila Khalili, Christos H. Halios, Jeetendra Sahani, Nasrin Aghamohammadi, Maria de Fatima Andrade, Maria Athanassiadou, Kamaldeep Bhui, Nerea Calvillo, Shi-Jie Cao, Frederic Coulon, Jill L. Edmondson, David Fletcher, Edmilson Dias de Freitas, Hai Guo, Matthew C. Hort, Madhusudan Katti, Thomas Rodding Kjeldsen, Steffen Lehmann, Giuliano Maselli Locosselli, Shelagh K. Malham, Lidia Morawska, Rajan Parajuli, Christopher D.F. Rogers, Runming Yao, Fang Wang, Jannis Wenk, and Laurence Jones

1  
2  
3  
4  
5  
6  
7  
8  
9  
10  
11  
12  
13  
14  
15  
16  
17  
18  
19  
20  
21  
22  
23  
24

**Supplementary Information (SI)**

for

**Urban heat mitigation by green and blue infrastructure: a review of drivers,  
effectiveness, and future needs**

Prashant Kumar<sup>1,2,10,\*</sup>, Sisay Debele<sup>1</sup>, Soheila Khalili<sup>1</sup>, Christos H. Haliotis<sup>3</sup>, Jeetendra Sahani<sup>1</sup>, Nasrin Aghamohammadi<sup>4,5</sup>, Maria de Fatima Andrade<sup>6</sup>, Maria Athanassiadou<sup>7</sup>, Kamaldeep Bhui<sup>8</sup>, Nerea Calvillo<sup>9</sup>, Shi-Jie Cao<sup>1,10</sup>, Frederic Coulon<sup>11</sup>, Jill L. Edmondson<sup>12</sup>, David Fletcher<sup>13</sup>, Edmilson Dias de Freitas<sup>6</sup>, Hai Guo<sup>14</sup>, Matthew C Hort<sup>7</sup>, Madhusudan Katti<sup>15</sup>, Thomas Rodding Kjeldsen<sup>16</sup>, Steffen Lehmann<sup>17</sup>, Giuliano Maselli Locosselli<sup>18</sup>, Shelagh K Malham<sup>19</sup>, Lidia Morawska<sup>1,20</sup>, Rajan Parajuli<sup>21</sup>, , Christopher DF Rogers<sup>22</sup>, Runming Yao<sup>3,23</sup>, Fang Wang<sup>24,25</sup>, Jannis Wenk<sup>16</sup>, Laurence Jones<sup>13,26</sup>

*<sup>1</sup>Global Centre for Clean Air Research (GCARE), School of Sustainability, Civil and Environmental Engineering, Faculty of Engineering and Physical Sciences, University of Surrey, Guildford GU2 7XH, United Kingdom*

*<sup>2</sup>Institute for Sustainability, University of Surrey, Guildford GU2 7XH, Surrey, United Kingdom*

*<sup>3</sup>School of Built Environment, University of Reading, Shinfield Rd, Whiteknights Rd, Reading RG6 6BU, United Kingdom*

*<sup>4</sup>School Design and the Built Environment, Curtin University Sustainability Policy Institute, Kent St, Bentley, 6102, Western Australia*

*<sup>5</sup>Harry Butler Institute, Murdoch University, Murdoch, 6150 Western Australia*

*<sup>6</sup>Atmospheric Sciences Department, Institute of Astronomy, Geophysics and Atmospheric Sciences, University of Sao Paulo, 05508-090, Sao Paulo, Brazil*

25 <sup>7</sup>*Met Office, FitzRoy Road, Exeter, EX1 3PB, United Kingdom*

26 <sup>8</sup>*Department of Psychiatry and Nuffield Department of Primary Care Health Sciences,*  
27 *Wadham College, University of Oxford, Oxford, United Kingdom*

28 <sup>9</sup>*Centre for Interdisciplinary Methodologies, University of Warwick, United Kingdom*

29 <sup>10</sup>*School of Architecture, Southeast University, 2 Sipailou, Nanjing, 210096, China*

30 <sup>11</sup>*Cranfield University, School of Water, Environment and Energy, Cranfield, MK43 0AL,*  
31 *United Kingdom*

32 <sup>12</sup>*Plants, Photosynthesis, Soil Cluster, School of Biosciences, University of Sheffield,*  
33 *Sheffield S10 2TN, United Kingdom*

34 <sup>13</sup>*UK Centre for Ecology & Hydrology, Environment Centre Wales, Deiniol Road, Bangor*  
35 *LL57 2UW, United Kingdom*

36 <sup>14</sup>*Air Quality Studies, Department of Civil and Environmental Engineering, The Hong Kong*  
37 *Polytechnic University, Hong Kong, China*

38 <sup>15</sup>*Department of Forestry and Environmental Resources, Faculty Excellence Program for*  
39 *Leadership in Public Science, North Carolina State University, Chancellor', Raleigh, NC,*  
40 *27695, USA*

41 <sup>16</sup>*Departments of Architecture & Civil Engineering, and Chemical Engineering, University of*  
42 *Bath, Bath BA2 7AY, United Kingdom*

43 <sup>17</sup>*School of Architecture, University of Nevada, Las Vegas, NV 89154, USA*

44 <sup>18</sup>*Department of Tropical Ecosystems Functioning, Center of Nuclear Energy in Agriculture,*  
45 *University of São Paulo, Piracicaba, 13416-000, Sao Paulo, Brazil*

46 <sup>19</sup>*School of Ocean Sciences, Bangor University, Menai Bridge, Anglesey, LL59 5 AB, United*  
47 *Kingdom*

48 <sup>20</sup>*International Laboratory for Air Quality and Health, Science and Engineering Faculty,*  
49 *Queensland University of Science and Technology, Queensland, Australia*

50 <sup>21</sup>*Department of Forestry and Environmental Resources, North Carolina State University,*  
51 *Raleigh NC 27695, USA*

52 <sup>22</sup>*Department of Civil Engineering, School of Engineering, University of Birmingham,*  
53 *Edgbaston, Birmingham B15 2TT, United Kingdom*

54 <sup>23</sup>*Joint International Research Laboratory of Green Buildings and Built Environments,*  
55 *School of the Civil Engineering, Chongqing University, China*

56 <sup>24</sup>*State Key Laboratory of Soil and Sustainable Agriculture, Institute of Soil Science, Chinese*  
57 *Academy of Sciences, Nanjing 210008, China*

58 <sup>25</sup>*University of Chinese Academy of Sciences, Beijing 100049, China*

59 <sup>26</sup>*Liverpool Hope University, Department of Geography and Environmental Science, Hope*  
60 *Park, Liverpool L16 9JD, United Kingdom*

61

62 This document includes:

63 Sections S1-S2

64 Figures S1-S7.

65 Tables S1-S9

## 66 **S1 Methodology**

67 We screened studies based on the following criteria: (a) addressing urban heat  
68 mitigation using one or more GBGI types, (b) clear identification of at least one GBGI sub-  
69 category under investigation, (c) a clear link between the primary GBGI category and heat  
70 mitigation performance, including temperature reduction and associated co-benefits, and (d)  
71 accessibility of full-text articles from the databases for further review and data extraction.

72 After removing duplicates, 25,974 publications that didn't meet these criteria were  
73 eliminated, leaving 1,512 publications for further screening (Figure 2b). We retrieved and  
74 assessed the full text of each paper for eligibility (Figure 2c). Articles not meeting inclusion  
75 criteria, such as those mainly focusing on heat causes and impacts, methodological aspects of  
76 heat mitigation without a direct GBGI connection, or discussions limited to general green and  
77 blue spaces without specific GBGI details and cooling effectiveness, were excluded. After  
78 this additional screening, 1,250 more papers were discarded, resulting in 262 publications for  
79 final review. Out of these, 60 more publications were excluded due to insufficient  
80 performance reporting or a failure to mention the GBGI used. In the end, 202 publications  
81 (1.8% of the originally identified 27,486 publications) were chosen for meta-analysis and  
82 further consideration in this review (Figure 2d, e). First we cataloged data from the selected  
83 studies, extracting information from 202 of them, including (1) the study's location (site, city,  
84 country, and region), (2) the specific type of GBGI, (3) the nature of the study (monitoring,  
85 modeling, remote sensing, or a combination), (4) whether single or multiple GBGIs were  
86 studied, (5) qualitative or quantitative data on co-benefits, air temperature, land surface  
87 temperature (LST) reduction (in °C), and day or night air temperature reduction (in °C), (6)  
88 any identified knowledge gaps, and (7) key findings. We developed a data form to capture  
89 this essential information from the selected studies (Table S1). This information was used to  
90 address key objectives, including when and where previous articles were published, the types  
91 of GBGIs used for urban heat mitigation, and the nature of co-benefits and maximum  
92 temperature reductions reported. Following this, we analysed and synthesised the data from  
93 selected studies to address the specific review objectives. The information on the benefits of  
94 various GBGI subcategories was examined using descriptive statistics with R-project  
95 software. To create an evaluation framework for GBGI types and their services in addressing

96 heat-related challenges and associated co-benefits, we used a min-max normalization  
97 approach, scaling the data from 1 (none) to 6 (very high) (see Table 2). This standardized  
98 method was then applied to the relevant publications within each GBGI category. Out of the  
99 202 publications, 64.7% primarily focused on heat mitigation as their main ecosystem  
100 service, while the remaining 35.3% discussed co-benefits alongside direct heat mitigation  
101 benefits.

102 The review proceeds with a summary of how GBGI mitigates heat stress, followed by  
103 mapping study origins, exploring GBGI interventions, and presenting evidence of their  
104 cooling advantages and co/dis-benefits. It also provides a conceptual framework for GBGI  
105 implementation and addresses existing knowledge gaps. The review concludes with major  
106 findings and recommendations for effective GBGI implementation to mitigate urban heat.

107 Five additional co-benefits are identified, including enhanced recreational opportunities and  
108 improvements in air/water quality.

### 109 **S1.1 GBGI classification, scope, and outline**

110 The conceptualisation and classification of GBGI types can differ due to varying  
111 interpretations from country to country, contingent on research contexts and the primary  
112 objective of studies. Sustainability objectives are selectively applied within different GBGI  
113 development frameworks, leading to a plethora of definitions and interpretations.<sup>1</sup> These  
114 variations depend on whether GBGI is applied to ecological resources<sup>2</sup> or includes natural  
115 green spaces, or is confined to highly altered landscapes intended for public benefit.<sup>3</sup>  
116 Consequently, it becomes challenging to specifically distinguish between green and grey  
117 infrastructure, such as cycle paths passing through green areas that provide additional  
118 recreational benefits. Often, scientists categorise non-ecological resources as GBGI, for  
119 example, permeable pavements, rainwater barrels, and rain gardens. For this review, we

120 adopt the GBGI classification presented by Jones et al.<sup>4</sup> and expand it further by introducing  
121 two new categories, mixed (blue-green) and backyard irrigation,<sup>5-7</sup> giving a total of 51 GBGI  
122 types. This classification uses a green-blue-grey continuum to cover natural green or blue,  
123 engineered green, blue, or hybrid (green-blue-grey) combinations. The typology was  
124 designed to flexibly incorporate all GBGI types within a typical urban environment. Within  
125 the scope of this review, we examined 51 GBGI types grouped under 10 broad categories:  
126 gardens, parks, amenity areas, linear features/routes, constructed GI on infrastructure, hybrid  
127 GI (for water), water bodies, other non-sealed urban areas, other public spaces, and mixed –  
128 (green-blue).

129 The task of examining and integrating the diverse benefits of GBGIs was challenging due to  
130 their complex interactions and discipline-specific applications. For instance, public health is  
131 directly or indirectly tied to almost all evaluated benefits, encompassing psychological,  
132 social, and economic aspects.<sup>8</sup> Therefore, this study focuses on the direct GBGI cooling  
133 benefits (heat mitigation), whilst indirect benefits such as management of other natural  
134 hazards (floods, droughts), the creation of new infrastructure (such as interconnected green  
135 infrastructure corridors to support active travel; Rogers and Hunt<sup>9</sup>) or associated social costs  
136 avoided by using specific GBGI types are considered as a secondary objective. In the course  
137 of this review, five more co-benefits were identified: (1) enhanced recreational opportunities,  
138 (2) ambient noise reduction, (3) flood and drought risk mitigation, (4) improvements in  
139 air/water quality, and (5) biodiversity (Section 3.3.2). Detailed GBGI design and  
140 implementation principles, along with global GBGI challenges, have been covered in earlier  
141 reviews (Table 1) and therefore were beyond the scope of this paper.

142 The review commences with a concise summary of how GBGI mitigates heat stress (Section  
143 3), followed by a spatial and temporal mapping of study origins, an exploration of various  
144 GBGI interventions, and a presentation of quantitative evidence supporting the direct cooling  
145 advantages and other co/dis-benefits (Section 4). Section 5 provides a nine-stage conceptual  
146 framework for GBGI implementation for heat mitigation based on the qualitative analysis of  
147 the reviewed literature and discusses practical recommendations for the design,  
148 implementation, monitoring, evaluation, and upscaling of GBGI to mitigate heat risks.  
149 Section 6 highlights the existing knowledge gaps. The review culminates with major  
150 conclusions and lays out a series of recommendations for the effective implementation of  
151 GBGI to mitigate urban heat (Section 7).

## 152 **S1.2 Search and selection of relevant studies**

153 The goal of this review was to offer an in-depth assessment review and analysis of  
154 GBGI's functions and benefits concerning urban cooling, as well as their potential co-benefits  
155 and drawbacks. This approach led to an expansion of the scope beyond that of previous  
156 reviews covered, enables us to uncover overlooked geographical patterns and examine the  
157 temporal trends in the origin of studies, and knowledge voids in the existing literature.  
158 PRISMA methodology was adopted for this systematic review.<sup>10</sup> Figure 1 provides a  
159 flowchart depicting our search and evaluation methodology, including its resultant findings.  
160 Our literature search consisted of five stages:

161 **(1) Development of search terms:** To identify a comprehensive range of studies related to  
162 urban heat mitigation, relevant search terms were determined based on research gaps,  
163 objectives, and predetermined categories and subcategories within the GBGI framework. This  
164 approach ensures the inclusion of a diverse set of studies that are pertinent to the field of heat



165 mitigation. A range of relevant search terms based on keywords for urban heat mitigation was  
166 identified based on research gaps, objectives, and predetermined GBGI categories and  
167 subcategories to allow the identification of a wide range of studies relevant to heat mitigation.  
168 Search term combinations of GBGI type and heat are listed in Supplementary Information  
169 (SI) Table S1.

170 **(2) Search and identification of relevant studies:** A peer-reviewed literature search was  
171 conducted via Boolean search term combinations (Table S1) utilising Web of Science (WoS),  
172 as the most comprehensive database with the ability to handle complex keyword searches.  
173 Studies published between 2010 and 2023 were included. The chosen timeframe was  
174 specifically selected to effectively manage the substantial number of search results,  
175 preventing an overwhelming amount of hits. Moreover, this time frame enables a more  
176 comprehensive examination, particularly in relation to the GBGI, which gained increased  
177 recognition as "nature-based solution" after the year 2010. Cross-checks were performed  
178 using other databases such as Science Direct, Scopus, and Google Scholar to verify that no  
179 relevant studies were missed from the analysis. To ensure inclusivity, we used the same  
180 keywords as in WoS (Table S1) when searching on Google Scholar. We reviewed multiple  
181 pages of search results initially, but the relevance of studies decreased as we continued.  
182 Therefore, we concluded the search after examining the first 20 pages. Finally, we compared  
183 the results with papers from WoS and included any relevant publications that were missed in  
184 our analysis. After excluding articles not written in English, the search terms yielded a total  
185 of 27,486 publications, including review and research papers (Figure 2a).

186 **(3) Selection of studies:** The identified studies were screened against the following criteria:  
187 (a) addresses mitigation and/or adaptation to urban heat using one or several types of GBGI,

188 (b) distinctly identifies at least one GBGI sub-category under investigation, (c) the main  
189 GBGI category is clearly linked with heat mitigation performance, including actual or  
190 percentage temperature reduction, and any associated co-benefits, (d) the full texts were  
191 accessible from the databases for further review and data extractions. After removing  
192 duplicates, the remaining articles were reviewed and 25,974 publications that did not meet  
193 inclusion criteria were removed, leaving 1512 publications for further screening (Figure 2b).  
194 The full text of each paper was retrieved and assessed for eligibility (Figure 2c). Any articles  
195 not meeting the inclusion criteria, like those majorly focusing on causes and impacts of heat,  
196 methodological aspects of heat mitigation benefits without a direct tie to GBGI categories  
197 and temperature reductions or discussions confined to general green and blue spaces or green  
198 corridors without specific descriptions of GBGI types and cooling efficacy, were excluded.  
199 After this further screening, an additional 1250 papers were discarded, leaving 262  
200 publications for final screening. Out of these, 60 more publications were excluded due to  
201 non-reporting of performances or failure to mention the utilised GBGI. Eventually, a set of  
202 202 publications (1.8% of the originally identified 27,486 publications) was chosen for meta-  
203 analysis and subsequent deliberation in this review (Figure 2d, e).

204 **(4) Cataloguing the data:** Relevant data (e.g., location, type of GBGI, co-and dis-benefits,  
205 and knowledge gaps; Section 2.3) were extracted from the selected studies. The following  
206 data were extracted from the selected 202 studies: (1) the location of the GBGI study  
207 including the site, city, country, and region, (2) the specific type of GBGI, (3) the nature of  
208 the study, whether it was monitoring, modelling, remote sensing, or a combination of these,  
209 (4) either single or multiple GBGI, (5) qualitative or quantitative information on co-benefits,  
210 air temperature and land surface temperature (LST) reduction (in °C), and a day or night time  
211 air temperature reduction (in °C), (6) any identified knowledge gaps, and (7) key findings.

212 This process involved developing a data form to capture key information from the selected  
213 studies (Table S1). This extracted information was used to address the key objectives  
214 including when and where previous articles were published, the types of GBGI they utilised  
215 as mitigation measures for urban heat and the nature of co-benefits and maximum  
216 temperature reductions they reported.

217 **(5) Collating, summarising, and reporting the results:** The data obtained from the selected  
218 studies were analysed and synthesised in a way that addressed the specific questions raised as  
219 a part of the review objectives (Section 1). The extracted information on the (co-)benefits of  
220 various subcategories of GBGI was analysed using descriptive statistics using R-project  
221 software.<sup>11</sup> To develop an evaluation framework for GBGI types and the services offered to  
222 tackle heat-related challenges and their associated co-benefits, we adopted a min-max  
223 normalisation approach.<sup>12</sup> This approach, also referred to as feature scaling, included a linear  
224 transformation of the original data on a scale ranging from 1 (none) to 6 (very high) (see  
225 Table 2). Subsequently, this standardised methodology was applied to the pertinent  
226 publications within each GBGI category. Of the 202 publications, 64.7% discussed heat  
227 mitigation as their main ecosystem service. The remaining 35.3% discussed the co-benefits  
228 alongside the direct heat mitigation benefits (Section 3).

## 229 **S2 Mechanisms of temperature and heat stress regulation by GBGI**

### 230 **S2.1 Mechanisms of temperature and heat stress regulation by green infrastructure**

231 The mechanisms by which GI such as street trees, parks, green roofs, and green walls  
232 reduce heat are multifaceted and interconnected. Trees and plants help in the reduction of  
233 heat by providing shade and reducing the amount of direct sunlight reaching the ground,  
234 therefore lowering surface temperatures and mitigating the urban heat island (UHI) effect via  
235 creating a cooler microclimate.<sup>13-15</sup> Additionally, during evapotranspiration plants release

236 moisture which further cools the surrounding air by converting sensible heat into latent  
237 heat.<sup>16</sup> Parks can act as natural air conditioners through several mechanisms,<sup>17-19</sup> including the  
238 formation of microscale centripetal thermal system (park-breeze) that generate low-level  
239 advection currents which draw air from cooler green towards warmer urban areas.<sup>20</sup> Other GI  
240 elements such as green roofs, green walls, and roof gardens provide insulation, reduce heat  
241 absorption by buildings, and promote evaporative cooling (heat absorption, as water changes  
242 from liquid to a gas state in the air stream.<sup>21-24</sup> Vegetation also contributes to the dissipation  
243 of heat by acting as windbreaks, modifying airflow patterns, and facilitating natural  
244 ventilation.

## 245 **S2.2 Mechanisms of temperature and heat stress regulation by blue infrastructure**

246 Blue infrastructure (BI), in the form of water-based natural or constructed features  
247 including ponds and wetlands, actively mitigates heat effects by cooling the surrounding  
248 environment.<sup>20</sup> This is achieved through processes such as evapotranspiration, shading, the  
249 albedo effect, groundwater recharge, and temperature buffering.<sup>25,26</sup> BI can provide cooling  
250 during the day (acts as a heat sink by absorbing and storing heat from the surrounding  
251 environment) whereas it may lead to warming at night (re-releasing the heat due to water's  
252 higher heat capacity compared to the land surface).<sup>27</sup> Evaporation from water bodies also  
253 helps cool the air, creating a microclimate with lower temperatures and thereby helping to  
254 mitigate the UHI effect.<sup>28</sup> Larger urban water bodies can also generate cool breezes that  
255 further lower the ambient temperature and provide relief during hot weather through  
256 evaporative cooling.<sup>20</sup> Furthermore, surfaces of blue infrastructure are often highly reflective,  
257 especially under calm conditions, thereby increasing surface reflectivity which, in turn,  
258 contributes to the reduction of heat absorption,<sup>29</sup> thus helping to mitigate heat build-up and  
259 contributing to the cooling of the surrounding area. Some of the blue infrastructure such as

260 wetlands, ponds/lakes, swales, and rain gardens also act as natural sponges, storing water and  
 261 releasing it during high air temperatures, thereby moderating temperatures in the vicinity by  
 262 increasing water availability for evaporation through groundwater recharge.<sup>30</sup>

263

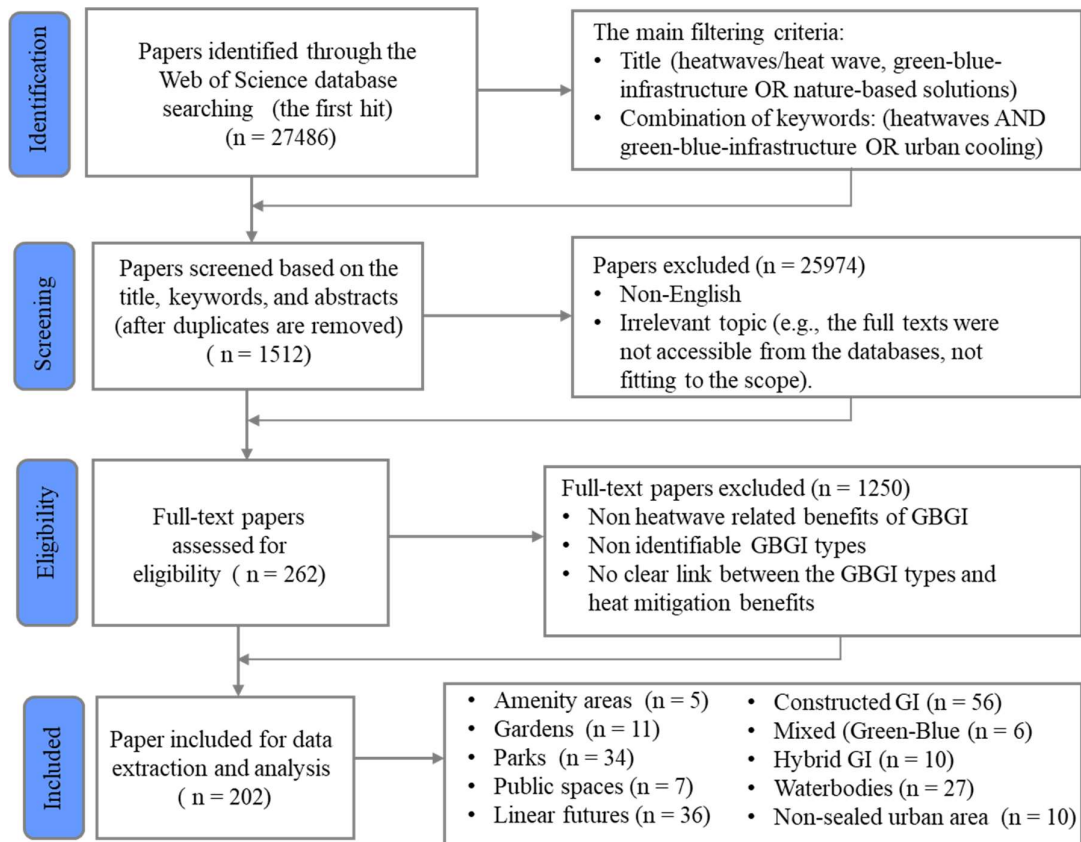

264

265 **Figure S1.** Flowchart of the inclusion and exclusion criteria (e.g. article identification,

266 screening, eligibility check, and inclusion) process and the number of GBGI main categories

267 included.

268

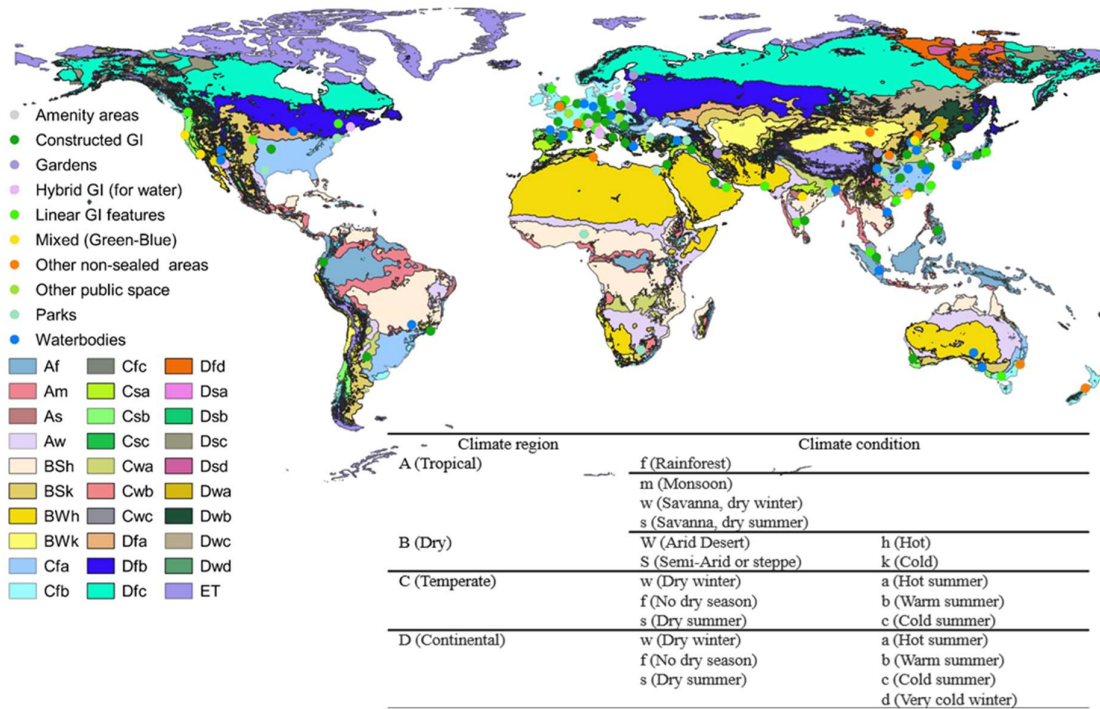

269 **Figure S2.** Köppen-Geiger climate classification: the main climate region (A-D) and detailed  
 270 climate conditions (right column) where GBGs are implemented.

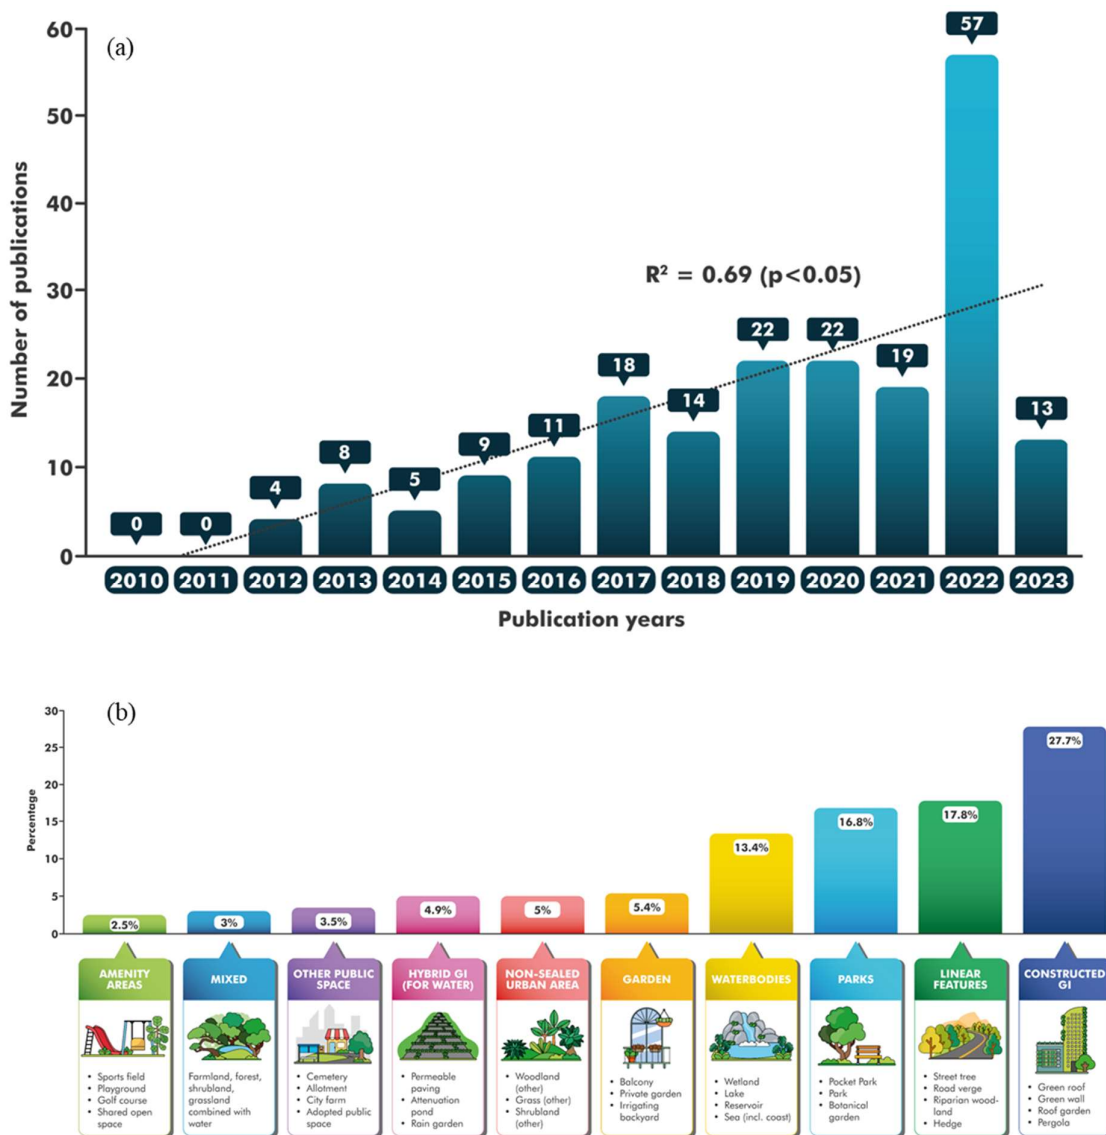

271

272 **Figure S3. (a)** The number of publications exhibiting a significant linear increase over time,  
 273 with the linear trend ( $R^2=0.69$ ;  $p=0.00043$ ) providing the best fit among the various trends  
 274 (exponential, linear, polynomial, power functions) analysed. Our search in 2023 was limited  
 275 to the month of 30 March 2023, and the trend line did not incorporate the 2023 data as it did  
 276 not cover the entire year. (b) The number of publications in each of the 10 main GBGI  
 277 categories. The number of publications covering all the GBGI sub-categories is shown in  
 278 Figure 1a.

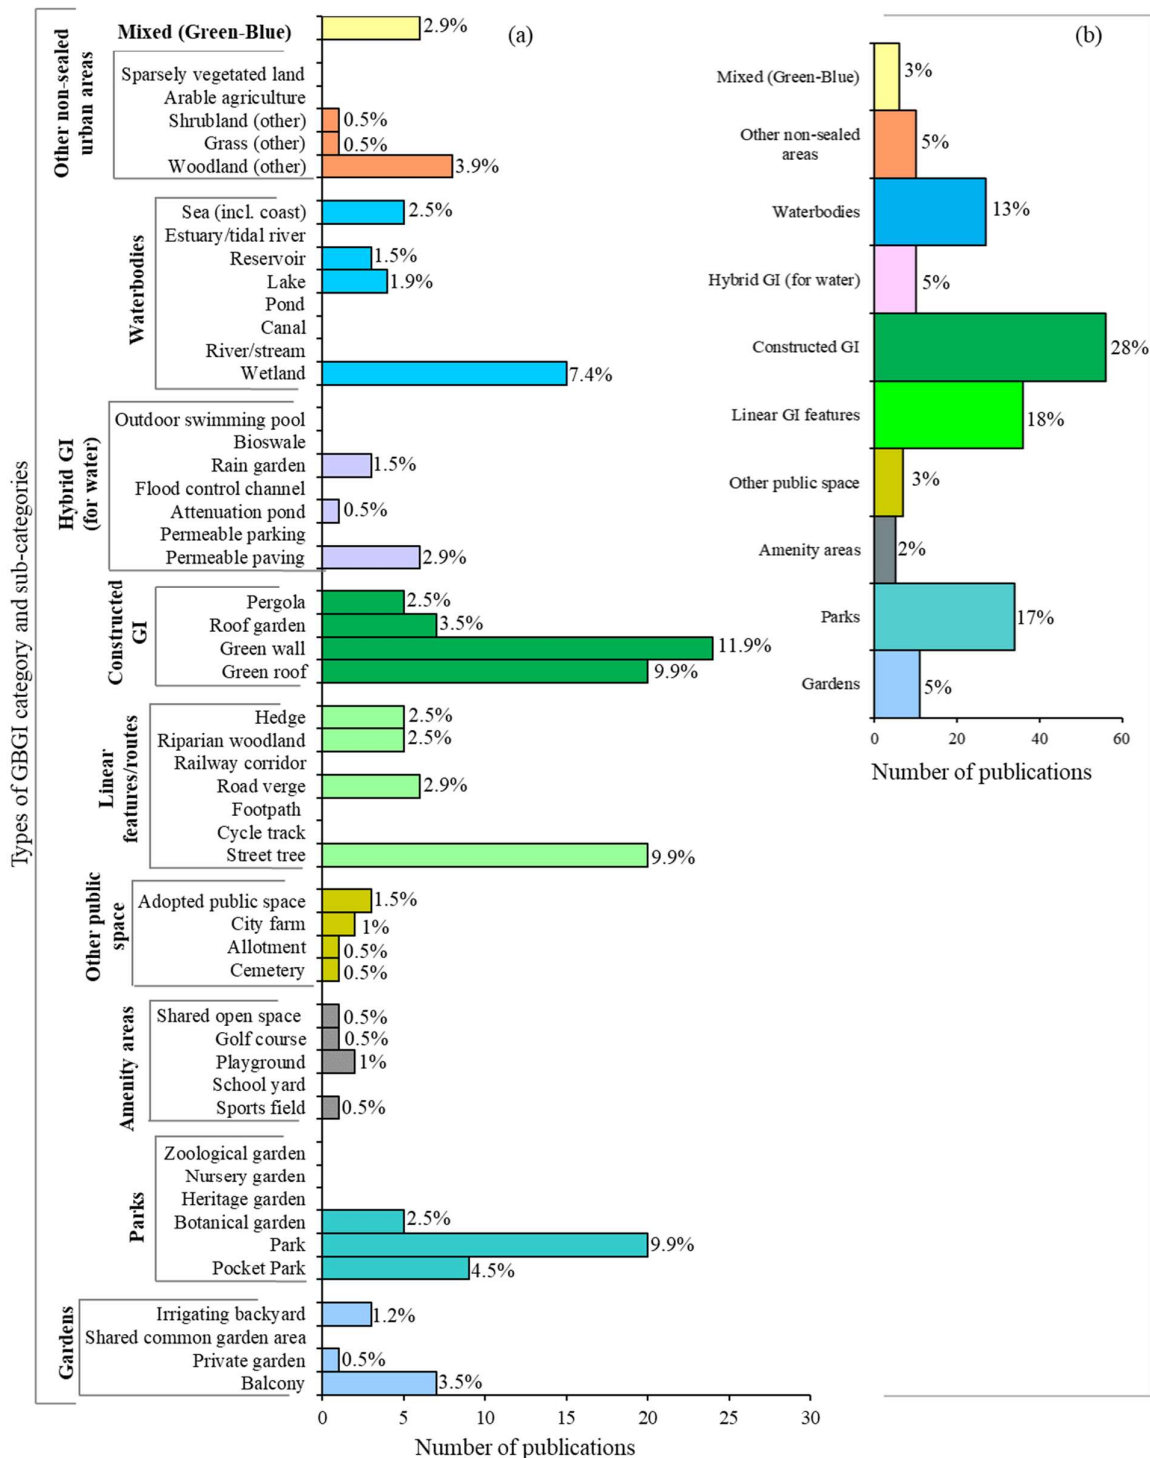

279

280

**Figure S4.** Relevant publications on the benefits of GBGI for heat adaptation and mitigation

281

evidence gathered from the literature: (a) number of publications covering the main

282

categories and sub-categories and (b) number of publications covering the main category

283

(shown by the bold coloured text). The percentage values are printed on the top of each bar.



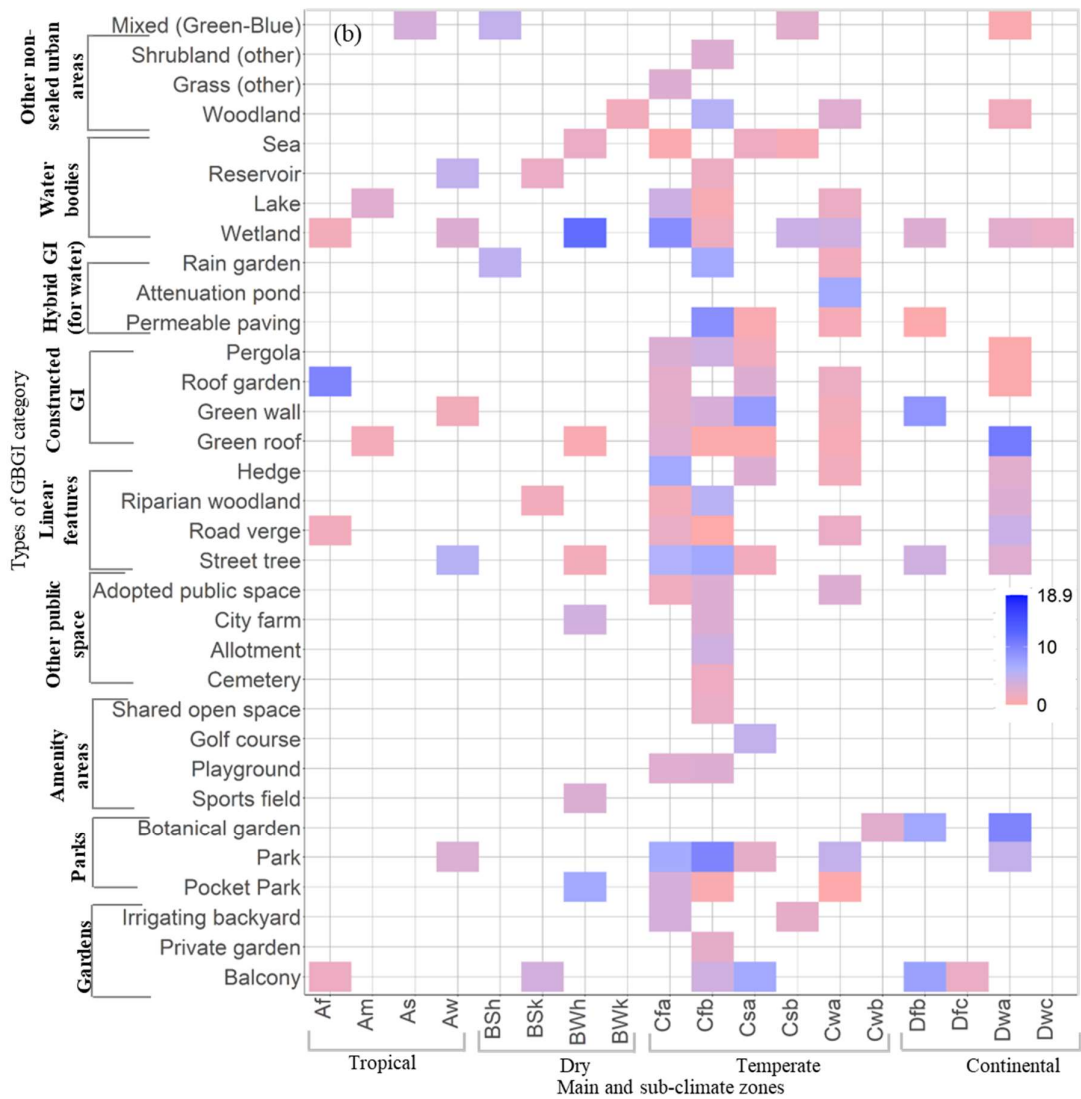

284  
 285 **Figure S5.** The effectiveness of the main and sub-GBGI categories implemented in tropical  
 286 (n = 16), dry (n = 15), temperate (n = 137), and continental (n = 34) climate zones of  
 287 Köppen-Geiger climate classification.

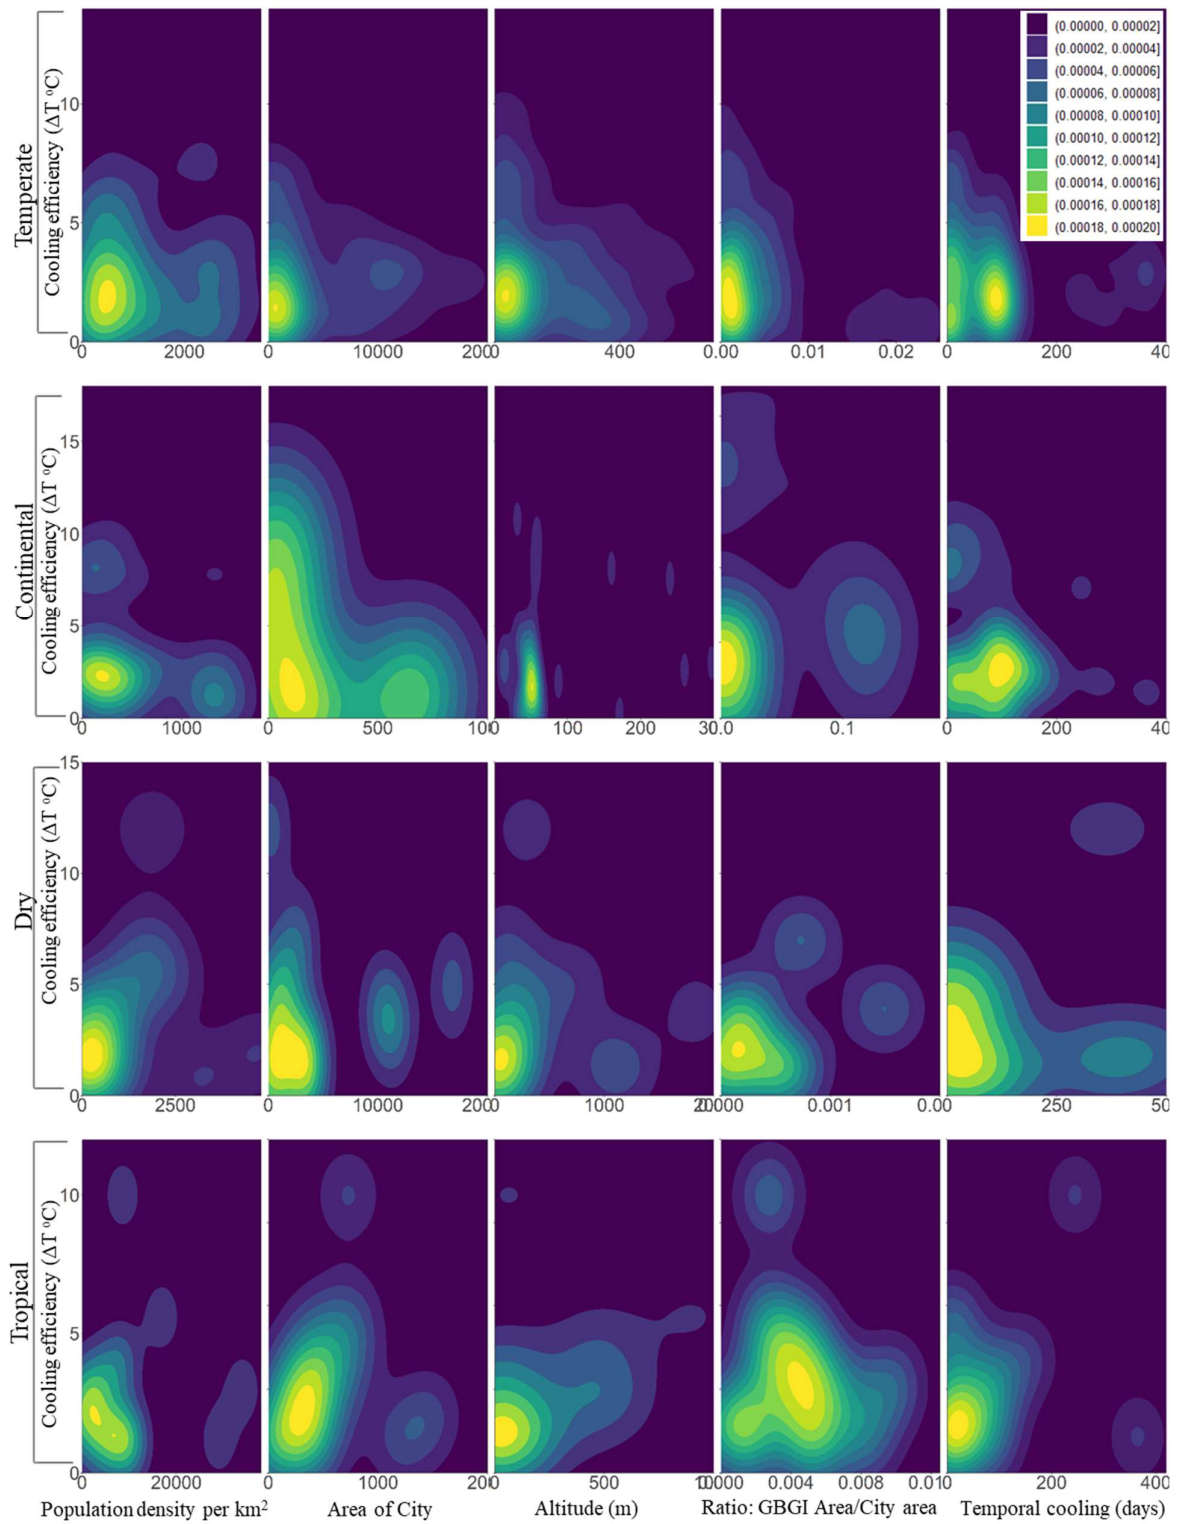

288

289 **Figure S6.** The density of GBGI cooling efficiency in different climate zones and against  
 290 population density, area of the city, altitude, ratio: area of GBGI/area of the city, and  
 291 temporal scale of cooling.

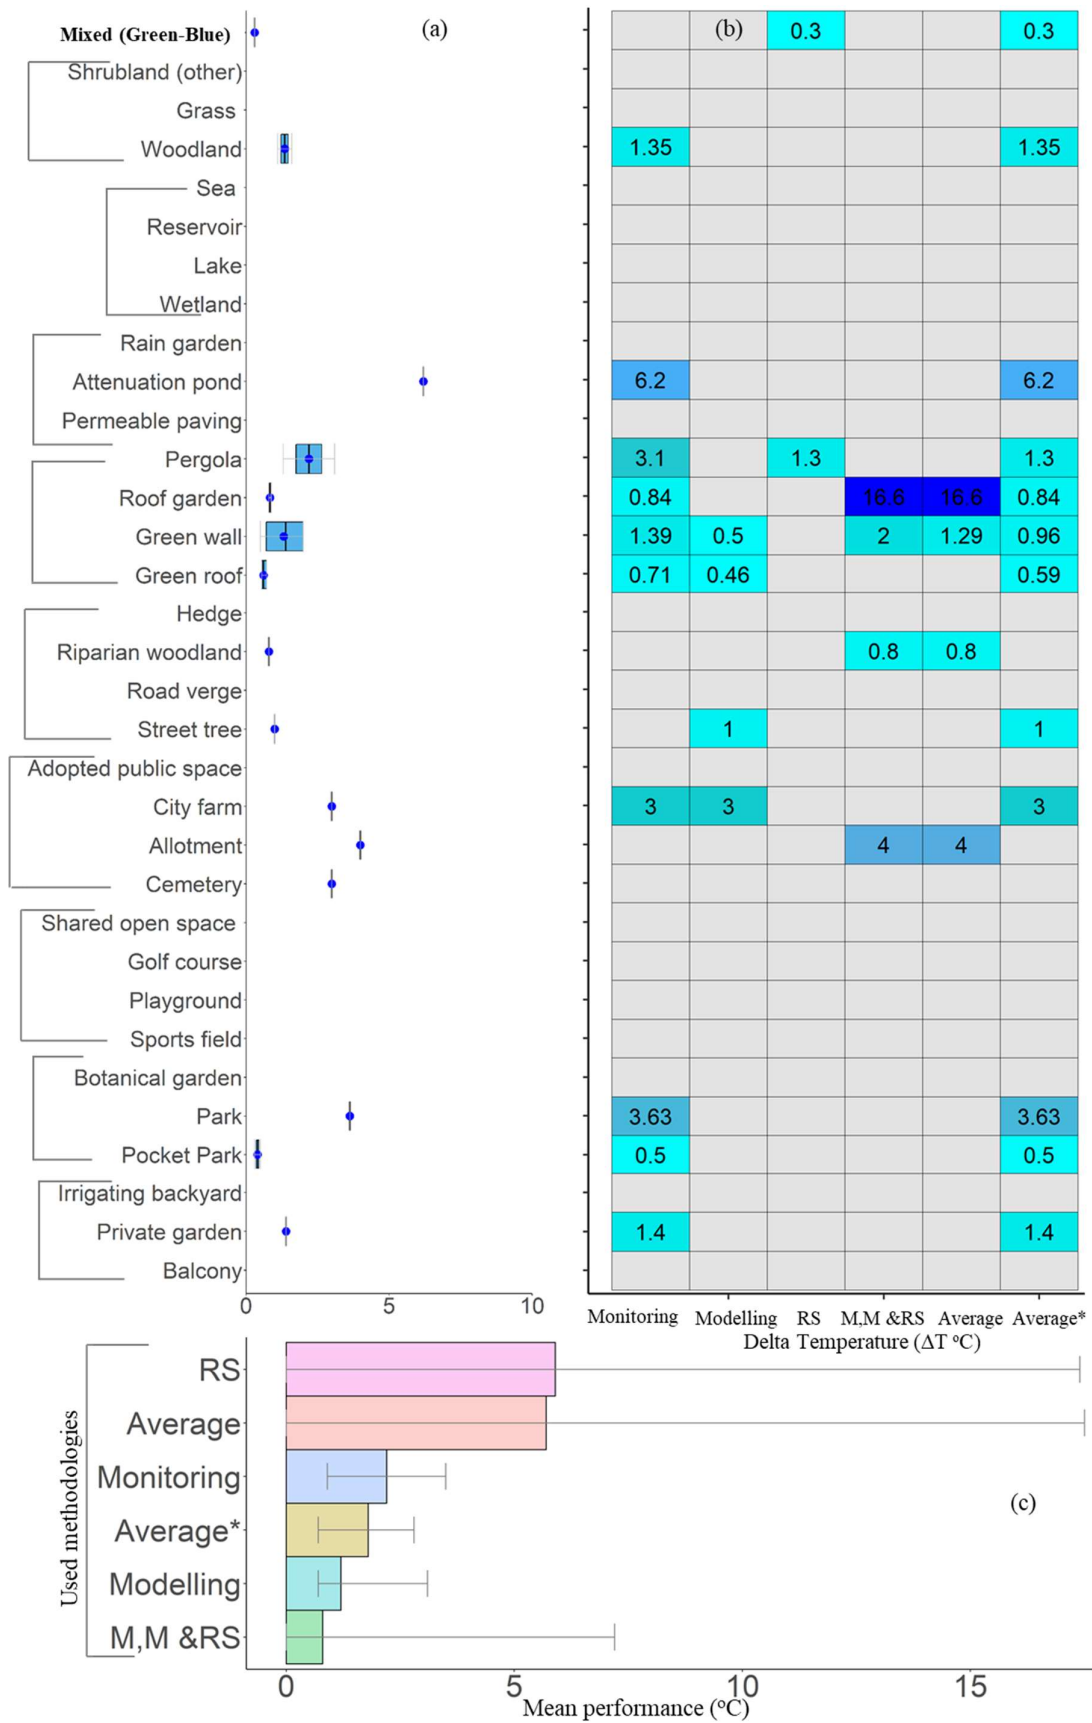

293 **Figure S7.** Night-time temperature reduction efficiency of GBGI sub-categories: (a) a  
294 summary of the overall performance of different GBGI types from all studies, (b) heatmap  
295 showing GBGI performances from for different methods and the average values, and (c)  
296 overall average of GBGI efficiency for urban heat mitigation. The ‘Average’ and ‘Average\*’  
297 values represent the average of all study types with and without RS data, respectively. M&M  
298 denotes combined monitoring and modelling studies. The colour gradient represents the  
299 performance, with grey cells representing studies that did not consider either monitoring,  
300 modelling, M&M, or RS. The figure uses a boxplot representation with the median indicated  
301 by a thick vertical black line, the mean represented by blue dots, and the upper and lower  
302 quartiles indicated by the box boundaries. The circle with a vertical line represents the GBGI  
303 categories with only one publication.

304 **Table S1.** The table below serves as a sample for organising the datasets obtained from the  
 305 reviewed papers for each of the 51 sub-categories.

| Paper Title                                                                                                            | Source                            | Online Link                                                                                                 | Study type (modelling, monitoring) | Location (City, Country)                                           | Co-benefits | Multiple GBGIs       | ΔT      | Day-time ΔT °C | Night-time ΔT °C | Unit | Gap | Dis-benefits | Summary                                                                                                                                                                                                                                                                                                               |
|------------------------------------------------------------------------------------------------------------------------|-----------------------------------|-------------------------------------------------------------------------------------------------------------|------------------------------------|--------------------------------------------------------------------|-------------|----------------------|---------|----------------|------------------|------|-----|--------------|-----------------------------------------------------------------------------------------------------------------------------------------------------------------------------------------------------------------------------------------------------------------------------------------------------------------------|
| Evaluating the vertical cooling performances of urban vegetation scenarios in a residential environment                | Journal of Building Engineering   | <a href="https://doi.org/10.1016/j.jobee.2021.102313">https://doi.org/10.1016/j.jobee.2021.102313</a>       | Modelling                          | Changsha, Hunan Province, China (27°51'–28°40' N, 111°53'–114°5'E) | -           | grass, shrubs, trees | 0.49 °C | -              | -                | oC   |     | -            | The results of the study show that shadowing can directly affect the cooling effect of vegetation. The cooling effect of vegetation types that provide a large area of shadowing is better, and the green coverage rate cannot directly reflect the shadowing situation of the regional environment.                  |
| What's 'cool' in the world of green façades? How plant choice influences the cooling properties of green walls         | Building and Environment          | <a href="https://doi.org/10.1016/j.buildenv.2013.12.005">https://doi.org/10.1016/j.buildenv.2013.12.005</a> | Monitor                            | Reading, UK                                                        |             |                      | 6.3 oC  |                |                  | oC   |     |              | Artificial wall sections were used to provide replicated data sets in both outdoor and controlled environmental conditions.                                                                                                                                                                                           |
| Thermal behavior of a vertical green facade and its impact on the indoor and outdoor thermal environment               | Energy and Building               | <a href="https://doi.org/10.1016/j.enbuild.2019.109502">https://doi.org/10.1016/j.enbuild.2019.109502</a>   | Monitoring                         | Guangzhou, China,                                                  |             |                      | 2.7 °C  |                |                  | oC   |     |              | Measurements and calculations of operative and WBGT temperatures, mass and heat fluxes and energy consumption in two westward identical rooms, one with a green wall system installed. The results indicated that transpiration could consume approximately 50% of solar radiation absorbed by the vegetation canopy. |
| Impacts of green walls on the characteristics of thermo-flow and photochemical reaction kinetics within street canyons | Urban Forestry and Urban Greening | <a href="https://doi.org/10.1016/j.ufug.2022.127568">https://doi.org/10.1016/j.ufug.2022.127568</a>         | Numerical modelling                |                                                                    |             |                      | 1.02°C  |                |                  | oC   |     |              | CFD looking on the effect of GWs on wind, temp, CO and NO2/NO/03 fields in a street canyon. Four scenarios. Results are discussed in temp reduction and co-benefits cells                                                                                                                                             |
| A Hedera green façade – Energy performance and saving under different maritime-temperate, winter weather conditions    | Building and Environment          | <a href="https://doi.org/10.1016/j.buildenv.2015.04.011">https://doi.org/10.1016/j.buildenv.2015.04.011</a> | Monitoring                         | University of Reading, UK                                          |             |                      | 3 oC    |                |                  | oC   |     |              | Temperature differences were affected by weather parameters, aspect, diurnal time and canopy density. Largest savings in energy due to vegetation were associated with more extreme weather, such as cold temperatures, strong wind or rain.                                                                          |

306

307

308 **Table S2.** The string of keywords used to record literature for the review of the efficiency of  
 309 51 GBGI categories to mitigate heat.

| GBGI Type        | Keywords                                                | Number of publications Identified |
|------------------|---------------------------------------------------------|-----------------------------------|
|                  |                                                         | Web of Science                    |
| Pocket park      | pocket park AND heat waves                              | -                                 |
|                  | pocket park AND urban heat island                       | 14                                |
|                  | pocket park AND temperature reduction                   | 3                                 |
|                  | pocket park AND cooling                                 | 10                                |
|                  | <b>Pocket Park (Total)</b>                              | <b>27</b>                         |
| Park             | park NOT pocket park AND heat waves                     | 1623                              |
|                  | park NOT pocket park AND urban heat island              | 907                               |
|                  | park NOT pocket park AND temperature reduction          | 6804                              |
|                  | park NOT pocket park AND cooling                        | 9741                              |
|                  | <b>Park (Total)</b>                                     | <b>19075</b>                      |
| Botanical garden | botanical garden OR arboretum AND heat waves            | 1                                 |
|                  | botanical garden OR arboretum AND urban heat island     | 10                                |
|                  | botanical garden OR arboretum AND temperature reduction | 10                                |
|                  | botanical garden OR arboretum AND cooling               | 20                                |
|                  | <b>Botanical garden (Total)</b>                         | <b>41</b>                         |
| Heritage garden  | heritage garden AND heat waves                          | 3                                 |
|                  | heritage garden AND urban heat island                   | 3                                 |
|                  | heritage garden AND temperature reduction               | 1                                 |
|                  | heritage garden AND cooling                             | 6                                 |
|                  | <b>Heritage garden (Total)</b>                          | <b>13</b>                         |

|                          |                                                            |             |
|--------------------------|------------------------------------------------------------|-------------|
| <b>Nursery garden</b>    | nursery garden AND heat waves                              | -           |
|                          | nursery garden AND urban heat island                       | -           |
|                          | nursery garden AND temperature reduction                   | 12          |
|                          | nursery garden AND cooling                                 | 3           |
|                          | <b>Nursery garden (Total)</b>                              | <b>15</b>   |
| <b>Zoological garden</b> | zoo OR zoos OR zoological garden AND heat waves            | 2           |
|                          | zoo OR zoos OR zoological garden AND urban heat island     | 1           |
|                          | zoo OR zoos OR zoological garden AND temperature reduction | 12          |
|                          | zoo OR zoos OR zoological garden AND cooling               | 31          |
|                          | <b>Zoological garden (Total)</b>                           | <b>46</b>   |
| <b>Street Tree</b>       | street tree AND heat waves                                 | 51          |
|                          | street tree AND urban heat island                          | 326         |
|                          | street tree AND temperature reduction                      | 123         |
|                          | street tree AND cooling                                    | 246         |
|                          | <b>Street Tree (Total)</b>                                 | <b>746</b>  |
| <b>Cycle track</b>       | cycle path OR cycle track AND heat waves                   | 6           |
|                          | cycle path OR cycle track AND urban heat island            | 14          |
|                          | cycle path OR cycle track AND temperature reduction        | 421         |
|                          | cycle path OR cycle track AND cooling                      | 896         |
|                          | <b>Cycle track (Total)</b>                                 | <b>1337</b> |
| <b>Footpath</b>          | footpath AND heat waves                                    | -           |
|                          | footpath AND urban heat island                             | 6           |
|                          | footpath AND temperature reduction                         | 0           |
|                          | footpath AND cooling                                       | 1           |
|                          | <b>Footpath (Total)</b>                                    | <b>7</b>    |

|                          |                                                                             |            |
|--------------------------|-----------------------------------------------------------------------------|------------|
| <b>Road verge</b>        | roadside OR verge AND heat waves                                            | 6          |
|                          | roadside OR verge AND urban heat island                                     | 26         |
|                          | roadside OR verge AND temperature reduction                                 | 48         |
|                          | roadside OR verge AND cooling                                               | 103        |
|                          | <b>Road verge (Total)</b>                                                   | <b>183</b> |
| <b>Railway corridor</b>  | rail AND heat waves                                                         | 31         |
|                          | rail AND urban heat island                                                  | 7          |
|                          | rail AND temperature reduction                                              | 300        |
|                          | rail AND cooling                                                            | 456        |
|                          | <b>Railway corridor (Total)</b>                                             | <b>794</b> |
| <b>Riparian woodland</b> | riparian tree OR riparian wood OR riparian forest AND heat waves            | 4          |
|                          | riparian tree OR riparian wood OR riparian forest AND urban heat island     | 4          |
|                          | riparian tree OR riparian wood OR riparian forest AND temperature reduction | 16         |
|                          | riparian tree OR riparian wood OR riparian forest AND cooling               | 28         |
|                          | <b>Riparian woodland (Total)</b>                                            | <b>52</b>  |
| <b>Hedge</b>             | hedge AND heat waves                                                        | 3          |
|                          | hedge AND urban heat island                                                 | 9          |
|                          | hedge AND temperature reduction                                             | 47         |
|                          | hedge AND cooling                                                           | 52         |
|                          | <b>Hedges (Total)</b>                                                       | <b>111</b> |
| <b>Green Roof</b>        | green roof AND heat waves                                                   | 104        |
|                          | green roof AND urban heat island                                            | 806        |
|                          | green roof AND temperature reduction                                        | 360        |
|                          | green roof AND cooling                                                      | 886        |



|                    |                                                       |      |
|--------------------|-------------------------------------------------------|------|
|                    | <b>Green Roof (Total)</b>                             | 2156 |
| <b>Green Wall</b>  | green wall OR green facade AND heat waves             | 57   |
|                    | green wall OR green façade AND urban heat island      | 295  |
|                    | green wall OR green façade AND temperature reduction  | 298  |
|                    | green wall OR green façade AND cooling                | 536  |
|                    | <b>Green Wall (Total)</b>                             | 1186 |
| <b>Roof garden</b> | roof garden OR roof terrace AND heat waves            | 12   |
|                    | roof garden OR roof terrace AND urban heat island     | 57   |
|                    | roof garden OR roof terrace AND temperature reduction | 22   |
|                    | roof garden OR roof terrace AND cooling               | 80   |
|                    | <b>Roof garden (Total)</b>                            | 171  |
| <b>Pergola</b>     | pergola AND heat waves                                | -    |
|                    | pergola AND urban heat island                         | 5    |
|                    | pergola AND temperature reduction                     | 5    |
|                    | pergola AND cooling                                   | 7    |
|                    | <b>Pergola (Total)</b>                                | 17   |
| <b>Road verge</b>  | Road verge AND heat waves                             | 0    |
|                    | Road verge AND urban heat island                      | 0    |
|                    | Road verge AND temperature reduction                  | 1    |
|                    | Road verge AND cooling                                | 2    |
|                    | (roadside* OR verge*) AND cooling                     | 207  |
|                    | (roadside* OR verge*) AND heat waves                  | 12   |
|                    | (roadside* OR verge*) AND urban heat island           | 29   |
|                    | (roadside* OR verge*) AND temperature reduction       | 62   |
|                    | <b>Road verge (Total)</b>                             | 313  |

|                         |                                                           |            |
|-------------------------|-----------------------------------------------------------|------------|
| <b>Permeable paving</b> | Permeable Paving AND Heatwaves                            | 0          |
|                         | Permeable Paving AND Urban Heat Island                    | 26         |
|                         | Permeable Paving AND cooling                              | 18         |
|                         | Permeable Paving AND Temperature reduction                | 8          |
|                         | Permeable parking/roadway AND Heatwaves                   | 0          |
|                         | Permeable parking/roadway AND Urban Heat Island           | 0          |
|                         | Permeable parking/roadway AND Temperature reduction       | 0          |
|                         | "permeable park*" OR "permeable road Heatwaves reduction" | 13         |
|                         | "permeable park*" OR "permeable road Urban Heat Island"   | 13         |
|                         | Permeable park*" OR "permeable road Temperature reduction | 13         |
|                         | <b>Permeable Paving AND cooling</b>                       | <b>18</b>  |
|                         | <b>Permeable Paving (Total)</b>                           | <b>109</b> |
| <b>Attenuation pond</b> | Attenuation pond AND Heatwaves                            | 0          |
|                         | Attenuation pond AND Urban Heat Island                    | 1          |
|                         | Attenuation pond AND Temperature reduction                | 8          |
|                         | Attenuation pond AND cooling                              | 6          |
|                         | <b>Permeable Paving (Total)</b>                           | <b>15</b>  |
| <b>Permeable paving</b> | Flood control channel AND Heatwaves                       | 0          |
|                         | Flood control channel AND Urban Heat Island               | 1          |
|                         | Flood control channel AND Temperature reduction           | 22         |
|                         | flood* OR channel or Heatwaves*                           | 1          |
|                         | flood* OR channel or Urban Heat Island*                   | 2          |
|                         | flood* OR channel or Temperature reduction*               | 35         |
|                         | Flood control channel AND cooling                         | 30         |
|                         | <b>Flood Control Channel (Total)</b>                      | <b>91</b>  |

|                              |                                                 |            |
|------------------------------|-------------------------------------------------|------------|
| <b>Rain garden</b>           | Rain garden AND Heatwaves                       | 2          |
|                              | Rain garden AND Urban Heat Island               | 23         |
|                              | Rain garden AND Temperature reduction           | 22         |
|                              | Rain garden AND cooling                         | 14         |
|                              | <b>Rain Garden (Total)</b>                      | <b>61</b>  |
| <b>Bioswale</b>              | Bioswale AND cooling                            | 1          |
|                              | Bioswale AND Heatwaves                          | 0          |
|                              | Bioswale AND Urban Heat Island                  | 1          |
|                              | Bioswale AND Temperature reduction              | 1          |
|                              | <b>Bioswale (Total)</b>                         | <b>3</b>   |
| <b>Outdoor swimming pool</b> | Outdoor swimming pool AND cooling               | 16         |
|                              | Outdoor swimming pool AND Heatwaves             | 0          |
|                              | Outdoor swimming pool AND Urban Heat Island     | 3          |
|                              | Outdoor swimming pool AND Temperature reduction | 3          |
|                              | <b>Outdoor swimming pool (Total)</b>            | <b>22</b>  |
| <b>Canal</b>                 | Canal AND cooling                               | 338        |
|                              | Canal AND Heatwaves                             | 1          |
|                              | Canal AND Urban Heat Island                     | 4          |
|                              | Canal AND Temperature reduction                 | 160        |
|                              | <b>Canal (Total)</b>                            | <b>503</b> |
| <b>Estuary/ tidal river</b>  | Estuary/tidal river AND cooling                 | 0          |
|                              | Estuary/tidal river AND Heatwaves               | 0          |
|                              | Estuary/tidal river AND Urban Heat Island       | 0          |
|                              | Estuary/tidal river AND Temperature reduction   | 0          |
|                              | <b>Estuary/ tidal river (Total)</b>             | <b>0</b>   |
| <b>River/ Stream</b>         | River/stream AND cooling                        | 8          |
|                              | River/stream AND Heatwaves                      | 0          |

|                          |                                                              |       |
|--------------------------|--------------------------------------------------------------|-------|
|                          | River/stream AND Urban Heat Island                           | 0     |
|                          | River/stream AND Temperature reduction                       | 7     |
|                          | river* OR stream* AND Heatwaves                              | 0     |
|                          | river* OR stream* AND Urban Heat Island                      | 0     |
|                          | river* OR stream*AND Temperature reduction                   | 0     |
|                          | <b>River/ Stream (Total)</b>                                 | 15    |
| <b>River/<br/>Stream</b> | Reservoir AND cooling                                        | 3955  |
|                          | Reservoir AND Heatwaves                                      | 15    |
|                          | Reservoir AND Urban Heat Island                              | 44    |
|                          | Reservoir AND Temperature reduction                          | 0     |
|                          | <b>Reservoir (Total)</b>                                     | 4014  |
| <b>Lake</b>              | Lake AND Heatwaves                                           | 53    |
|                          | Lake AND Urban Heat Island                                   | 167   |
|                          | Lake AND Temperature reduction                               | 0     |
|                          | Lake AND cooling                                             | 4715  |
|                          | <b>Lake (Total)</b>                                          | 4935  |
| <b>Sea</b>               | Sea (incl. coast) AND Heatwaves                              | 0     |
|                          | Sea (incl. coast) AND Urban Heat Island                      | 495   |
|                          | Sea (incl. coast) AND Temperature reduction                  | 6957  |
|                          | Sea AND cooling                                              | 15381 |
|                          | (sea OR seaside OR coast* OR beach* OR shore and Heatwaves*) | 0     |
|                          | <b>Sea (Total)</b>                                           | 22833 |
| <b>Pond</b>              | Pond AND Heatwaves                                           | 0     |
|                          | Pond AND Urban Heat Island                                   | 0     |
|                          | Pond AND cooling                                             | 945   |
|                          | Pond AND Temperature reduction                               | 0     |

|                        |                                                                                        |     |
|------------------------|----------------------------------------------------------------------------------------|-----|
|                        | <b>Pond (Total)</b>                                                                    | 945 |
| <b>Balcony/terrace</b> | Balcony AND Heatwaves                                                                  | 1   |
|                        | Balcony AND Urban Heat Island                                                          | 7   |
|                        | Balcony AND Temperature reduction                                                      | 21  |
|                        | terrace AND Urban Heat Island                                                          | 16  |
|                        | terrace AND Urban Heatwaves                                                            | 1   |
|                        | terrace AND Temperature reduction                                                      | 233 |
|                        | <b>Balcony/terrace (Total)</b>                                                         | 279 |
| <b>Road verge</b>      | Riparian woodland AND heat waves                                                       | 1   |
|                        | Riparian woodland AND urban heat island                                                | 0   |
|                        | Riparian woodland AND temperature reduction                                            | 7   |
|                        | Riparian woodland AND cooling                                                          | 20  |
|                        | ("riparian tree*" OR "riparian wood*" OR "riparian forest*") AND cooling               | 66  |
|                        | ("riparian tree*" OR "riparian wood*" OR "riparian forest*") AND heat waves            | 3   |
|                        | ("riparian tree*" OR "riparian wood*" OR "riparian forest*") AND urban heat island     | 4   |
|                        | ("riparian tree*" OR "riparian wood*" OR "riparian forest*") AND temperature reduction | 30  |
|                        | <b>Riparian woodland (Total)</b>                                                       | 131 |
| <b>Playground</b>      | Playground AND Heatwaves                                                               | 1   |
|                        | Playground AND Urban Heat Island                                                       | 9   |
|                        | Playground AND Temperature reduction                                                   | 19  |
|                        | Playground AND cooling                                                                 | 33  |
|                        | <b>Playground (Total)</b>                                                              | 62  |
| <b>Golf course</b>     | Golf course AND Heatwaves                                                              | 0   |
|                        | Golf course AND Urban Heat Island                                                      | 4   |

|                             |                                                |            |
|-----------------------------|------------------------------------------------|------------|
|                             | Golf course AND Temperature reduction          | 11         |
|                             | Golf course AND cooling                        | 111        |
|                             | <b>Golf course(Total)</b>                      | <b>126</b> |
| <b>Shared open space</b>    | Shared open space AND Heatwaves                | 1          |
|                             | Shared open space AND Urban Heat Island        | 4          |
|                             | Shared open space AND Temperature reduction    | 10         |
|                             | Shared open space AND cooling                  | 44         |
|                             | <b>Shared open space(Total)</b>                | <b>59</b>  |
| <b>Cemetery</b>             | Cemetery AND Heatwaves                         | 0          |
|                             | Cemetery AND Urban Heat Island                 | 5          |
|                             | Cemetery AND Temperature reduction             | 1          |
|                             | Cemetery AND cooling                           | 12         |
|                             | <b>Cemetery (Total)</b>                        | <b>18</b>  |
| <b>Allotment</b>            | Allotment AND Temperature reduction            | 5          |
|                             | Allotment AND Urban Heat Island                | 6          |
|                             | Allotment AND Temperature reduction            | 5          |
|                             | Allotment AND cooling                          | 15         |
|                             | <b>Allotment (Total)</b>                       | <b>31</b>  |
| <b>City farm</b>            | City farm AND Heatwaves                        | 1          |
|                             | City farm AND Urban Heat Island                | 23         |
|                             | City farm AND Temperature reduction            | 20         |
|                             | City farm AND cooling                          | 44         |
|                             | <b>City farm (Total)</b>                       | <b>88</b>  |
| <b>Adopted public space</b> | Adopted public space AND Heatwaves             | 1          |
|                             | Adopted public space AND Urban Heat Island     | 13         |
|                             | Adopted public space AND Temperature reduction | 8          |

|                             |                                                     |             |
|-----------------------------|-----------------------------------------------------|-------------|
|                             | Adopted public space AND cooling                    | 18          |
|                             | <b>Adopted public space (Total)</b>                 | <b>40</b>   |
| <b>Woodland</b>             | Woodland (other) AND Heatwaves                      | 3           |
|                             | Woodland (other) AND Urban Heat Island              | 8           |
|                             | Woodland (other) AND Temperature reduction          | 34          |
|                             | Woodland AND cooling                                | 457         |
|                             | <b>Woodland (Total)</b>                             | <b>502</b>  |
| <b>Grass (other)</b>        | Grass (other) AND Heatwaves                         | 9           |
|                             | Grass (other) AND Urban Heat Island                 | 40          |
|                             | Grass (other) AND Temperature reduction             | 155         |
|                             | Grass (other) AND cooling                           | 3041        |
|                             | <b>Grass (other) (Total)</b>                        | <b>3245</b> |
| <b>Arable agriculture</b>   | Arable agriculture AND Heatwaves                    | 0           |
|                             | Arable agriculture AND Urban Heat Island            | 0           |
|                             | Arable agriculture AND Temperature reduction        | 0           |
|                             | Arable agriculture AND cooling                      | 24          |
|                             | <b>Arable agriculture (Total)</b>                   | <b>24</b>   |
| <b>Private Garden</b>       | Private garden AND Heatwaves                        | 0           |
|                             | Private garden AND Urban Heat Island                | 5           |
|                             | Private garden AND Temperature reduction            | 1           |
|                             | Private garden AND cooling                          | 13          |
|                             | <b>Private Garden (Total)</b>                       | <b>19</b>   |
| <b>Shared common garden</b> | Shared common garden area AND Heatwaves             | 0           |
|                             | Shared common garden area AND Urban Heat Island     | 1           |
|                             | Shared common garden area AND Temperature reduction | 0           |

|                      |                                             |             |
|----------------------|---------------------------------------------|-------------|
|                      | Shared common garden area AND cooling       | 0           |
|                      | <b>Shared Common garden (Total)</b>         | <b>1</b>    |
| <b>Wetland</b>       | Wetland AND Heatwaves                       | 15          |
|                      | Wetland area AND Urban Heat Island          | 55          |
|                      | Wetland AND Temperature reduction           | 589         |
|                      | Wetland AND cooling                         | 587         |
|                      | <b>Wetland (Total)</b>                      | <b>1246</b> |
| <b>Estuary</b>       | Estuary AND Heatwaves                       | 22          |
|                      | Estuary AND Urban Heat Island               | 13          |
|                      | Estuary AND Temperature reduction           | 474         |
|                      | Estuary AND cooling                         | 428         |
|                      | <b>Estuary (Total)</b>                      | <b>937</b>  |
| <b>Sports fields</b> | Sports field AND Heatwaves                  | 1           |
|                      | Sports field AND Urban Heat Island          | 2           |
|                      | Sports field AND Temperature reduction      | 25          |
|                      | Sports field AND cooling                    | 102         |
|                      | <b>Sports field (Total)</b>                 | <b>130</b>  |
| <b>School yard</b>   | School yard AND Heatwaves                   | 0           |
|                      | School yard AND Urban Heat Island           | 2           |
|                      | School yard AND Temperature reduction       | 0           |
|                      | School yard AND cooling                     | 3           |
|                      | <b>School yard (Total)</b>                  | <b>5</b>    |
| <b>Shrubland</b>     | Shrubland (other) AND Heatwaves             | 0           |
|                      | Shrubland (other) AND Urban Heat Island     | 0           |
|                      | Shrubland (other) AND Temperature reduction | 0           |
|                      | Shrubland (other) AND cooling               | 16          |



|                                |                                                   |    |
|--------------------------------|---------------------------------------------------|----|
|                                | <b>Shrubland (Total)</b>                          | 16 |
| <b>Sparsely vegetated land</b> | Sparsely vegetated land AND Heatwaves             | 0  |
|                                | Sparsely vegetated land AND Urban Heat Island     | 0  |
|                                | Sparsely vegetated land AND Temperature reduction | 0  |
|                                | Sparsely vegetated land AND cooling               | 8  |
|                                | <b>Sparsely vegetated land (Total)</b>            | 8  |

310

311 **Table S3.** Classification matrix to categorise the number of studies available for each of the  
312 GBGI sub-categories in terms of heat mitigation. Zero values indicate that there is negligible  
313 empirical evidence available for GBGI's against urban heat mitigation, including heatwaves.

| Scale | Conditional performance (%) <sup>a</sup> | Evidence-based classification (%) <sup>b</sup> | Number of GBGI types <sup>c</sup> |
|-------|------------------------------------------|------------------------------------------------|-----------------------------------|
| 1     | None                                     | 0                                              | 18                                |
| 2     | Very low                                 | $\geq 0 \leq 20$                               | 15                                |
| 3     | Low                                      | $\geq 20 \leq 40$                              | 9                                 |
| 4     | Medium                                   | $\geq 40 \leq 60$                              | 4                                 |
| 5     | High                                     | $\geq 60 \leq 80$                              | 1                                 |
| 6     | Very High                                | $\geq 80$                                      | 4                                 |

314 <sup>a</sup>The number of publications from negligible to very high under the six-classification scale.

315 <sup>b</sup>The percentage availability of publications for each classification scale. <sup>c</sup>The number of  
316 GBGI types found in each of the classification scales.

317 **Table S4.** The best performing GBGI types in each climate zone and sub-climate type with  
318 reported magnitude and measured scale (i.e. inside/outside of GBGI) of cooling providing  
319 details of surroundings.

|           | GBGI (Sub climate#1, and del T) | GBGI (sub climate#2, and del T) | Inside/outside (scale)                   | Nearby surrounding         |
|-----------|---------------------------------|---------------------------------|------------------------------------------|----------------------------|
| Temperate | Wetland (Cfa, 10)               | Park (Cfb, 9.2)                 | Wetland works well at meso scale (mostly | Near built-up area (park), |

|             |                                             |                                                  |                                                                                                                                                                                                     |                                                                                                          |
|-------------|---------------------------------------------|--------------------------------------------------|-----------------------------------------------------------------------------------------------------------------------------------------------------------------------------------------------------|----------------------------------------------------------------------------------------------------------|
|             |                                             |                                                  | inside) than micro, on the contrary park works better on micro-scale (inside and outside both).                                                                                                     | Near nature (wetland)                                                                                    |
| Continental | Greenwall, Botanical garden (Dfb, 8.7 & 10) | Green roof and Botanical garden (Dwa, 10.8 & 10) | Works well at Microscale but not at meso and macro but the park can be suggested at the mesoscale.<br><br>Green roof (inside, outside and top) botanical garden (inside-outside), green wall (near) | Built-up area (green wall and botanical garden)<br><br>Green roof (mixed environment of grey and nature) |
| Dry         | Wetland, Pocket park (BWh, 12 & 7))         | -                                                | Microscale wetland (inside) pocket park (inside-outside)                                                                                                                                            | Wetland (near nature)<br><br>Pocket park (built-up area)                                                 |
| Tropical    | Roof garden (Af, 10)                        | -                                                | Microscale (inside and top)                                                                                                                                                                         | Built up area                                                                                            |

320 **Table S5.** Sample size (n), correlation of population and p-value density, city area, altitude,  
321 ratio of GBGI and city area, and temporal cooling with reported cooling by GBGI in four  
322 different climatic conditions i.e. continental, dry, temperate and tropical.

| Climate Zone                 |             | Correlation | P-value |
|------------------------------|-------------|-------------|---------|
| Population density (n = 34 ) | Continental | 0.0183      | 0.919   |
| (n = 15)                     | Dry         | 0.193       | 0.4791  |
| (n = 137)                    | Temperate   | -0.013      | 0.8827  |
| (n = 16)                     | Tropical    | 0.2241      | 0.404   |
| City Area                    | Continental | 0.018       | 0.9189  |

|                  |             |        |        |
|------------------|-------------|--------|--------|
| (n = 15)         | Dry         | 0.1981 | 0.4791 |
| (n = 137)        | Temperate   | -0.013 | 0.8827 |
| (n = 16)         | Tropical    | 0.22   | 0.404  |
| Altitude         | Continental | 0.135  | 0.4449 |
| (n = 15)         | Dry         | 0.0158 | 0.9552 |
| (n = 137)        | Temperate   | -0.089 | 0.2975 |
| (n = 16)         | Tropical    | 0.325  | 0.2188 |
| Ratio GBGI/city  | Continental | 0.0917 | 0.606  |
| (n = 15)         | Dry         | -0.117 | 0.6768 |
| (n = 137)        | Temperate   | -0.017 | 0.8386 |
| (n = 16)         | Tropical    | -0.328 | 0.2142 |
| Temporal cooling | Continental | 0.208  | 0.2367 |
| (n = 15)         | Dry         | 0.1132 | 0.6879 |
| (n = 137)        | Temperate   | 0.0399 | 0.6427 |
| (n = 16)         | Tropical    | 0.2824 | 0.2892 |

323

324

325

326

**Table S6.** The location, study types (in-situ, modelling, combined (in-situ and modelling), and remote sensing), and performance in reducing temperature ( $\Delta T$  °C) of different types of GBGI categories against extreme heat extracted from 202 papers.

| GBGI Type |  | GBGI Categories | Location (city, country) | Study type | Performance $\Delta T$ (°C) | Reference (Year)                 |
|-----------|--|-----------------|--------------------------|------------|-----------------------------|----------------------------------|
| Gardens   |  | Balcony         | Vienna                   | Monitoring | 4                           | Teichmann et al. <sup>31</sup>   |
|           |  |                 | Malaysia                 | Monitoring | 1.7                         | Toe and Kubota <sup>32</sup>     |
|           |  |                 | Tehran, Iran             | Modelling  | 7                           | Aghasizadeh et al. <sup>33</sup> |
|           |  |                 | China                    | Modelling  | 3.8                         | Cui and Zheng <sup>34</sup>      |
|           |  |                 | Lublin,                  | Monitoring | 0.22                        | Grudzińska <sup>35</sup>         |

|       |  |                     |                                |                        |      |                                |
|-------|--|---------------------|--------------------------------|------------------------|------|--------------------------------|
|       |  |                     | Poland                         |                        |      |                                |
|       |  |                     | Tampere, Finland               | Monitoring             | 2    | Hilliaho et al. <sup>36</sup>  |
|       |  |                     | Zamo, Poland                   | Modelling              | 7.6  | Grudzińska <sup>37</sup>       |
|       |  | Private garden      | Melbourne, Australia           | Monitoring             | 2.3  | Cheung et al. <sup>38</sup>    |
|       |  | Irrigating backyard | Sydney, Australia              | Modelling              | 3    | Gao et al. <sup>39</sup>       |
|       |  |                     | Adelaide, Australia            | Modelling              | 2.3  | Broadbent et al. <sup>40</sup> |
|       |  |                     | United States                  | Remote Sensing         | 3.74 | Wang et al. <sup>41</sup>      |
| Parks |  | Pocket Park         | Hong Kong                      | Monitoring             | 0.38 | Lau et al. <sup>42</sup>       |
|       |  |                     | Hong Kong                      | Monitoring             | 1.09 | Lin et al. <sup>433</sup>      |
|       |  |                     | New York                       | Monitoring             | 0.5  | Rosso et al. <sup>44</sup>     |
|       |  |                     | Veszprém, Hungary              | Modelling              | 0.6  | Trájer et al. <sup>45</sup>    |
|       |  |                     | Xi'an, China                   | Modelling              | 1.1  | Hou et al. <sup>46</sup>       |
|       |  |                     | Xi'an, China                   | Monitoring & Modelling | 0.43 | Ma et al. <sup>47</sup>        |
|       |  |                     | Shanghai, China                | Monitoring             | 3.6  | Wu et al. <sup>48</sup>        |
|       |  |                     | Cairo Metropolitan Area, Egypt | Modelling              | 7    | Ibrahim <sup>49</sup>          |
|       |  |                     | Hong Kong                      | Monitoring & Modelling | 0.13 | Huang et al. <sup>50</sup>     |
|       |  | Park                | Chongqing, Southwest China     | Modelling              | 0.8  | Lu et al. <sup>51</sup>        |

|  |  |  |                                          |                              |      |                                  |
|--|--|--|------------------------------------------|------------------------------|------|----------------------------------|
|  |  |  | Abuja,<br>Nigeria                        | Remote<br>Sensing            | 2.04 | Chibuike et<br>al. <sup>52</sup> |
|  |  |  | Shenzhen<br>City, China                  | Monitoring                   | 5.15 | Zhang et al. <sup>53</sup>       |
|  |  |  | Yreb, China                              | Remote<br>Sensing            | 2.34 | Shi et al. <sup>54</sup>         |
|  |  |  | Xian, China                              | Monitoring                   | 0.78 | Du et al. <sup>55</sup>          |
|  |  |  | Shenzhen,<br>China                       | Remote<br>Sensing            | 3.02 | Peng et al. <sup>56</sup>        |
|  |  |  | Taipei,<br>Taiwan                        | Monitoring<br>&<br>Modelling | 2.42 | Yang et al. <sup>57</sup>        |
|  |  |  | Wuhan,<br>China                          | Monitoring                   | 3.5  | Chen et al. <sup>58</sup>        |
|  |  |  | Kolkata<br>Metropolitan<br>Area, India   | Remote<br>Sensing            | 3.15 | Das et al. <sup>59</sup>         |
|  |  |  | Beijing,<br>China                        | Monitoring                   | 1.38 | Zhou et al. <sup>60</sup>        |
|  |  |  | Melbourne,<br>Australia                  | Remote<br>Sensing            | 3.28 | Algetawee <sup>61</sup>          |
|  |  |  | Beijing,<br>China                        | Remote<br>Sensing            | 1.71 | Qiu and Jia <sup>62</sup>        |
|  |  |  | Beijing,<br>China                        | Monitoring                   | 1.09 | Li et al. <sup>63</sup>          |
|  |  |  | Austin, US                               | Remote<br>Sensing            | 6.89 | Gao et al. <sup>64</sup>         |
|  |  |  | Taiwan                                   | Monitoring<br>&<br>Modelling | 2.42 | Yang et al. <sup>65</sup>        |
|  |  |  | Özgürlük<br>Park,<br>Istanbul,<br>Turkey | Monitoring<br>&<br>Modelling | 2.3  | Şimşek et<br>al. <sup>66</sup>   |
|  |  |  | Beijing,<br>China                        | Monitoring                   | 2.71 | Li et al. <sup>67</sup>          |

|                     |                     |                     |                      |                                |                              |                             |                              |
|---------------------|---------------------|---------------------|----------------------|--------------------------------|------------------------------|-----------------------------|------------------------------|
|                     |                     |                     | Hong Kong            | Monitoring                     | 4.9                          | Cheung et al. <sup>68</sup> |                              |
|                     |                     |                     | Melbourne, Australia | Remote Sensing                 | 10                           | Algetawee <sup>69</sup>     |                              |
|                     |                     |                     | Beijing, China       | Monitoring                     | 4.8                          | Yan et al. <sup>70</sup>    |                              |
|                     |                     | Botanical garden    | Baoji, China         | Monitoring                     | 2.7                          | Chang and Li <sup>71</sup>  |                              |
|                     |                     |                     | Erzurum, Turkey      | Monitoring                     | 2.6                          | Irmak et al. <sup>72</sup>  |                              |
|                     |                     |                     | Beijing, China       | Monitoring                     | 10                           | Su <sup>73</sup>            |                              |
|                     |                     |                     | Erzurum, Turkey      | Monitoring & Modelling         | 2.2                          | Yilmaz et al. <sup>74</sup> |                              |
|                     |                     |                     | Erzurum, Turkey      | Monitoring                     | 7.1                          | Yilmaz et al. <sup>75</sup> |                              |
|                     |                     | Amenity areas       | Sports field         | Khalifa stadium in Doha, Qatar | Monitoring & Modelling       | 3.1                         | Ghani et al. <sup>76</sup>   |
|                     |                     |                     | Playground           | Warsaw, Poland                 | Monitoring                   | 5                           | Kuchcik et al. <sup>77</sup> |
| United States       | Remote Sensing      |                     |                      | 5.5                            | Vanos et al. <sup>78</sup>   |                             |                              |
| Golf course         | Perth, Australia    |                     | Remote Sensing       | 6                              | Nguyen et al. <sup>79</sup>  |                             |                              |
| Shared open space   | Maxvorstadt, Munich |                     | Modelling            | 2.1                            | Zölch et al. <sup>80</sup>   |                             |                              |
| Other public spaces | Cemetery            | Budapest's, Hungary | Monitoring           | 1.7                            | Sallay et al. <sup>81</sup>  |                             |                              |
|                     | Allotment           | Berlin, Germany     | Remote Sensing       | 4                              | Rost et al. <sup>82</sup>    |                             |                              |
|                     | City farm           | Phoenix, Arizona    | Monitoring           | 3.9                            | Hawkins et al. <sup>83</sup> |                             |                              |
|                     |                     | Paris, France       | Modelling            | 3                              | Masson et al. <sup>84</sup>  |                             |                              |

|                        |            |                      |                                         |                        |     |                                          |
|------------------------|------------|----------------------|-----------------------------------------|------------------------|-----|------------------------------------------|
|                        |            | Adopted public space | Raiganj, West Bengal, India             | Monitoring & Modelling | 3   | Basu and Das <sup>85</sup>               |
|                        |            |                      | Bologna, Italy                          | Modelling              | 3   | Boeri et al. <sup>86</sup>               |
|                        |            |                      | Liverpool, NSW, Australia               | Modelling              | 1.5 | Abdollahzadeh and Bilorina <sup>87</sup> |
| Linear features/routes |            | Street tree          | Hangzhou city, Zhejiang Province, China | Monitoring             | 1.8 | Cai et al. <sup>88</sup>                 |
|                        |            |                      | Turin, Italy                            | Monitoring             | 0.5 | Morabito et al. <sup>89</sup>            |
|                        |            |                      | Florence, Italy                         | Modelling              | 9.4 | Napoli et al. <sup>90</sup>              |
|                        |            |                      | Nanjing, Jiangsu Province, China        | Modelling              | 5.5 | Xi et al. <sup>91</sup>                  |
|                        |            |                      | Karachi, Pakistan                       | Modelling              | 1.2 | Zeeshan et al. <sup>92</sup>             |
|                        |            |                      | Abu Dhabi                               | Monitoring & Modelling | 0.9 | Abu Ali et al. <sup>93</sup>             |
|                        |            |                      | Rome, Italy                             | Remote Sensing         | 3.2 | Marando et al. <sup>94</sup>             |
|                        |            |                      | Karachi, Pakistan                       | Modelling              | 1.2 | Zeeshan et al. <sup>95</sup>             |
|                        |            |                      | Montreal, Canada                        | Modelling              | 4   | Wang et al. <sup>96</sup>                |
|                        |            |                      | Vancouver, Canada                       | Remote Sensing         | 12  | Lachapelle et al. <sup>97</sup>          |
|                        |            |                      | Barcelona, Spain                        | Modelling              | 1.3 | Segura et al. <sup>98</sup>              |
| Shenyang,              | Monitoring | 2.9                  | Miao et al. <sup>99</sup>               |                        |     |                                          |

|  |  |               |                                           |                              |      |                                  |
|--|--|---------------|-------------------------------------------|------------------------------|------|----------------------------------|
|  |  |               | China                                     |                              |      |                                  |
|  |  |               | Prague<br>Czech<br>Republic               | Modelling                    | 5    | Geletic et al. <sup>100</sup>    |
|  |  |               | Basel,<br>Switzerland                     | Monitoring<br>&<br>Modelling | 2    | Mussetti et al. <sup>101</sup>   |
|  |  |               | Bangalore,<br>India                       | Monitoring                   | 5.6  | Valishery et al. <sup>102</sup>  |
|  |  |               | Dresden,<br>Germany                       | Monitoring                   | 2.22 | Gillner et al. <sup>103</sup>    |
|  |  |               | Melbourne,<br>Australia                   | Monitoring                   | 1.5  | Coutts et al. <sup>104</sup>     |
|  |  |               | Richmond,<br>Australia                    | Monitoring                   | 2.1  | Sanusi et al. <sup>105</sup>     |
|  |  |               | Vancouver,<br>Canada                      | Modelling                    | 7.1  | Aminipour et al. <sup>106</sup>  |
|  |  |               | Tsukuba<br>City, Japan                    | Monitoring                   | 5.9  | Kusaka et al. <sup>107</sup>     |
|  |  | Road<br>verge | Jongro,<br>Seoul,<br>Republic of<br>Korea | Monitoring                   | 4.44 | Cho <sup>108</sup>               |
|  |  |               | Taipei,<br>Taiwan                         | Monitoring                   | 0.68 | Huang and<br>Li <sup>109</sup>   |
|  |  |               | New<br>Belgrade,<br>Serbia                | Monitoring                   | 2.1  | Stojanovic et al. <sup>110</sup> |
|  |  |               | Kuala<br>Lumpur,<br>Malaysia              | Monitoring                   | 1.3  | Zaki et al. <sup>111</sup>       |
|  |  |               | Haikou,<br>China                          | Modelling                    | 2    | Zheng et al. <sup>8112</sup>     |
|  |  |               | Czech<br>Republic                         | Monitoring<br>&<br>Modelling | 0.05 | Žižlavská et al. <sup>113</sup>  |



|  |  |                   |                         |                        |      |                                    |
|--|--|-------------------|-------------------------|------------------------|------|------------------------------------|
|  |  | Riparian woodland | Sydney, Australia       | Monitoring             | 1.16 | Adams and Smith <sup>1144</sup>    |
|  |  |                   | Ejina basin, China      | Monitoring             | 1.28 | Yonghong et al. <sup>115</sup>     |
|  |  |                   | Yorkshire, England      | Monitoring             | 3    | Tsai et al. <sup>116</sup>         |
|  |  |                   | Glen Gironck, UK        | Remote sensing         | 5.4  | Dugdale et al. <sup>117</sup>      |
|  |  |                   | Beijing, China          | Monitoring             | 3    | Zheng et al. <sup>118</sup>        |
|  |  | Hedge             | Beijing, China          | Modelling              | 2.68 | Zhang and Hu <sup>119</sup>        |
|  |  |                   | Lazio, Italy            | Modelling              | 3    | Peluso et al. <sup>120</sup>       |
|  |  |                   | Rome, Italy             | Modelling              | 3    | Del Serrone et al. <sup>121</sup>  |
|  |  |                   | Shenzhen, China         | Monitoring & Modelling | 1.29 | Zou et al. <sup>1222</sup>         |
|  |  |                   | Sakai, Japan            | Remote Sensing         | 7    | Yoshida et al. <sup>123</sup>      |
|  |  | Green roof        | Berlin, Germany         | Modelling              | 0.44 | Wang et al. <sup>124</sup>         |
|  |  |                   | Mandaue, Philippines    | Modelling              | 1.1  | Cortes et al. <sup>125</sup>       |
|  |  |                   | Sydney, Australia       | Monitoring             | 9.63 | Fleck et al. <sup>126</sup>        |
|  |  |                   | Xiamen, China           | Remote Sensing         | 0.91 | Dong et al. <sup>127</sup>         |
|  |  |                   | Belgrade, Serbia        | Monitoring             | 5.5  | Kostadinovic et al. <sup>128</sup> |
|  |  |                   | Nanjing, China          | Monitoring             | 1.1  | Peng et al. <sup>129</sup>         |
|  |  |                   | Tseung Kwan O New Town, | Monitoring             | 4.9  | Lee and Jim <sup>130</sup>         |

|                                  |  |            |                                 |                        |       |                                   |
|----------------------------------|--|------------|---------------------------------|------------------------|-------|-----------------------------------|
|                                  |  |            | Hong Kong, China                |                        |       |                                   |
|                                  |  |            | Neubrandenburg, Germany         | Monitoring             | 1.5   | Kohler and Kaiser <sup>131</sup>  |
|                                  |  |            | Gangnam-gu, Seoul, South Korea  | Monitoring             | 10.8  | Park et al. <sup>132</sup>        |
|                                  |  |            | Jerusalem and Tel Aviv          | Monitoring & Modelling | 0.4   | Lynn and Lynn <sup>133</sup>      |
|                                  |  |            | Shenzhen, China                 | Monitoring             | 4.03  | Chen et al. <sup>134</sup>        |
|                                  |  |            | Mandaue, Philippines            | Modelling              | 1.1   | Cortes et al. <sup>135</sup>      |
|                                  |  |            | Utrecht, The Netherlands        | Monitoring             | 0.2   | Solcerova <sup>136</sup>          |
|                                  |  |            | Lodz, Poland                    | Modelling              | 0.19  | Bochenek and Klemm <sup>137</sup> |
|                                  |  |            | Guangzhou, China                | Modelling              | 0.1   | Chen et al. <sup>138</sup>        |
|                                  |  |            | Hamad, Northern Bahrain         | Modelling              | 0.72  | Elnabawi and Saber <sup>139</sup> |
|                                  |  |            | Chengdu, China                  | Monitoring             | 0.94  | Zuo et al. <sup>140</sup>         |
|                                  |  |            | Rome, Italy                     | Modelling              | 0.16  | Iaria and Susca <sup>141</sup>    |
|                                  |  |            | Sydney, Australia               | Monitoring             | 2.92  | Fleck et al. <sup>142</sup>       |
|                                  |  |            | Cordoba, Argentina              | Monitoring             | 0.892 | Robbiati et al. <sup>143</sup>    |
| Constructed GI on infrastructure |  | Green wall | Changsha, Hunan Province, China | Modelling              | 0.49  | Liao et al. <sup>144</sup>        |

|  |  |  |                           |                        |      |                                      |
|--|--|--|---------------------------|------------------------|------|--------------------------------------|
|  |  |  | Reading, UK               | Remote Sensing         | 6.3  | Cameron et al. <sup>145</sup>        |
|  |  |  | Guangzhou, China          | Monitoring             | 3.6  | Zhang et al. <sup>146</sup>          |
|  |  |  | Shanghai, China           | Modelling              | 1.02 | Liu et al. <sup>147</sup>            |
|  |  |  | Reading, UK               | Monitoring             | 3    | Cameron et al. <sup>148</sup>        |
|  |  |  | Madrid, Spain             | Monitoring             | 2.7  | Jesus et al. <sup>149</sup>          |
|  |  |  | Hong-Kong                 | Monitoring             | 1.19 | Lee and Jim <sup>150</sup>           |
|  |  |  | Rio de Janeiro, Brazil    | Modelling              | 1.16 | Feitosa and Wilkinson <sup>151</sup> |
|  |  |  | Zürich, Switzerland       | Modelling              | 0.1  | Li et al. <sup>152</sup>             |
|  |  |  | Prague, Czech Republic    | Monitoring & modelling | 2    | Geletič et al. <sup>153</sup>        |
|  |  |  | Ljubljana, Slovenia       | Remote Sensing         | 18.9 | Šuklje et al. <sup>154</sup>         |
|  |  |  | Tyrol, Austria            | Monitoring             | 8.7  | Medl et al. <sup>155</sup>           |
|  |  |  | Sydney, Australia         | Monitoring             | 7.7  | Feitosa and Wilkinson <sup>156</sup> |
|  |  |  | Bari, Valenza no, Italy   | Monitoring             | 7    | Blanco et al. <sup>157</sup>         |
|  |  |  | Pertth, Western Australia | Monitoring             | 8.1  | Bakhshoodeh et al. <sup>158</sup>    |
|  |  |  | Quito, Ecuador            | Modelling              | 1.43 | Davis et al. <sup>159</sup>          |
|  |  |  | London Olympic Park       | Monitoring             | 1.5  | Hosseinzadeh et al. <sup>160</sup>   |

|  |  |             |                        |                        |      |                                 |
|--|--|-------------|------------------------|------------------------|------|---------------------------------|
|  |  |             | La Rochelle, France    | Modelling              | 1.9  | Djedjig et al. <sup>161</sup>   |
|  |  |             | Chennai, India         | Modelling              | 1.2  | Pragati et al. <sup>162</sup>   |
|  |  |             | Guangzhou, China       | Monitoring             | 8    | Lin et al. <sup>163</sup>       |
|  |  |             | United States          | Monitoring             | 4.3  | Price et al. <sup>164</sup>     |
|  |  |             | Hong Kong              | Monitoring             | 1.2  | Lee and Jim <sup>165</sup>      |
|  |  |             | Munich, Germany        | Modelling              | 3.5  | Lin et al. <sup>166</sup>       |
|  |  |             | Chenzhou, Hunan, China | Modelling              | 2.56 | Li et al. <sup>167</sup>        |
|  |  | Roof garden | Nanjing, China         | Monitoring             | 1    | Peng et al. <sup>168</sup>      |
|  |  |             | Xinxiang, Henan, China | Monitoring             | 1    | Shen <sup>169</sup>             |
|  |  |             | Duhok, Iraq            | Monitoring             | 3    | AbdulBaqi <sup>170</sup>        |
|  |  |             | Seoul, South Korea     | Modelling              | 0.3  | Kim et al. <sup>171</sup>       |
|  |  |             | Hong Kong              | Monitoring             | 1.8  | Lee and Jim <sup>172</sup>      |
|  |  |             | Singapore              | Monitoring             | 17.7 | Tan et al. <sup>173</sup>       |
|  |  |             | Singapore              | Remote Sensing         | 10   | Tan et al. <sup>174</sup>       |
|  |  | Pergola     | Nagoya, Japan          | Remote Sensing         | 16.2 | Watanabe et al. <sup>175</sup>  |
|  |  |             | Arta, Greece           | Monitoring & Modelling | 1.3  | Katsoulas et al. <sup>176</sup> |
|  |  |             | Lleida, Spain          | Monitoring             | 3.1  | Chafer et al. <sup>177</sup>    |

|                 |         |                            |                                                   |                              |                           |                                    |
|-----------------|---------|----------------------------|---------------------------------------------------|------------------------------|---------------------------|------------------------------------|
|                 |         |                            | Suwon,<br>Republic of<br>Korea                    | Monitoring                   | 0.2                       | Kong et al. <sup>178</sup>         |
|                 |         |                            | Vienna,<br>Austria                                | Monitoring<br>&<br>Modelling | 4                         | Teichmann et<br>al. <sup>179</sup> |
| Hybrid GI       |         | Permeable<br>paving        | Vertemate<br>con<br>Minoprio,<br>CO, Italy        | Monitoring                   | 2.8                       | Fini et al. <sup>180</sup>         |
|                 |         |                            | Perugia, Italy                                    | Monitoring                   | 9.2                       | Kousis et<br>al. <sup>181</sup>    |
|                 |         |                            | Zhouzhi<br>County,<br>Xi'An,<br>Shaanxi,<br>China | Monitoring                   | 6                         | Lu et al. <sup>182</sup>           |
|                 |         |                            | Rome, Italy                                       | Modelling                    | 0.6                       | Moretti et<br>al. <sup>183</sup>   |
|                 |         |                            | Guangzhou,<br>China                               | Monitoring                   | 1                         | Wang et al. <sup>184</sup>         |
|                 |         |                            | Changping<br>China                                | Monitoring                   | 0.19                      | Wang et al. <sup>185</sup>         |
|                 |         | Attenuatio<br>n pond       | Guangzhou,<br>China                               | Monitoring                   | 7                         | Yang et al. <sup>186</sup>         |
|                 |         | Rain<br>garden             | Yau Tsim<br>Mong<br>district,<br>Hong Kong        | Modelling                    | 1.3                       | An et al. <sup>187</sup>           |
|                 |         |                            | Tucson,<br>Arizona                                | Monitoring                   | 5.2                       | Buzzard et<br>al. <sup>188</sup>   |
|                 |         |                            | Gdansk,<br>Poland                                 | Monitoring                   | 7                         | Kasprzyk et<br>al. <sup>189</sup>  |
| Waterbodi<br>es | Wetland | Zoige<br>Plateau,<br>China | Monitoring                                        | 2                            | Bai et al. <sup>190</sup> |                                    |
|                 |         | Beijing,<br>China          | Remote<br>Sensing                                 | 7.83                         | Cai et al. <sup>191</sup> |                                    |

|  |  |      |                                       |                |      |                                   |
|--|--|------|---------------------------------------|----------------|------|-----------------------------------|
|  |  |      | Vienna, Austria                       | Monitoring     | 3.4  | Pucher et al. <sup>192</sup>      |
|  |  |      | Avondale, Arizona                     | Remote Sensing | 12   | Ruiz-Aviles et al. <sup>193</sup> |
|  |  |      | Dhaka, Bangladesh, Anatolia           | Modelling      | 3    | Shahjahan et al. <sup>194</sup>   |
|  |  |      | Central Anatolia, Turkey              | Remote Sensing | 4.38 | Şimşek and Ödül <sup>195</sup>    |
|  |  |      | Beijing, China                        | Monitoring     | 3.15 | Sun et al. <sup>196</sup>         |
|  |  |      | Eastern Germany                       | Modelling      | 1.6  | Sušnik et al. <sup>197</sup>      |
|  |  |      | Palembang City, Indonesia             | Monitoring     | 1.2  | Triyuly et al. <sup>198</sup>     |
|  |  |      | Chengdu, China                        | Monitoring     | 4.08 | Wu et al. <sup>199</sup>          |
|  |  |      | Wuhan, China                          | Monitoring     | 4.8  | Xu et al. <sup>200</sup>          |
|  |  |      | Hangzhou, China                       | Remote Sensing | 9.27 | Zhang et al. <sup>201</sup>       |
|  |  |      | Northeast China                       | Remote Sensing | 8.15 | Wenguang et al. <sup>202</sup>    |
|  |  |      | Prairie Pothole Region, North America | Remote Sensing | 3    | Zhang et al. <sup>203</sup>       |
|  |  |      | Beijing, China                        | Remote Sensing | 2.6  | Sun et al. <sup>204</sup>         |
|  |  | Lake | Hue Citadel, Hue City, Vietnam        | Remote Sensing | 2.82 | Le Phuc et al. <sup>205</sup>     |
|  |  |      | Altenberge, Germany                   | Modelling      | 0.8  | Theeuwes et al. <sup>206</sup>    |

|                             |  |           |                               |                        |      |                                     |
|-----------------------------|--|-----------|-------------------------------|------------------------|------|-------------------------------------|
|                             |  |           | Wuhan, China                  | Monitoring             | 4.2  | Xu et al. <sup>207</sup>            |
|                             |  |           | Daming lake, Jinan, China     | Monitoring             | 1.9  | Yang et al. <sup>208</sup>          |
|                             |  | Reservoir | São José do Rio Preto, Brazil | Monitoring             | 5    | Masiero and de Souza <sup>209</sup> |
|                             |  |           | Northern, Spain               | Monitoring             | 2    | Novo et al. <sup>210</sup>          |
|                             |  |           | Santander, Spain              | Monitoring             | 1.82 | Novo et al. <sup>211</sup>          |
|                             |  | Sea       | Athens, Greece                | Monitoring & Modelling | 1.7  | Dandou et al. <sup>212</sup>        |
|                             |  |           | Sendai, Japan                 | Monitoring             | 1.3  | Zhou et al. <sup>213</sup>          |
|                             |  |           | Adelaide, Australia           | Monitoring             | 0.9  | Zhou et al. <sup>214</sup>          |
|                             |  |           | South Australia               | Monitoring             | 2    | Zhou et al. <sup>215</sup>          |
|                             |  |           | Wuhan, China                  | Modelling              | 0.4  | Zhu et al. <sup>216</sup>           |
| Other non-sealed urban area |  | Woodland  | Guildford, UK                 | Monitoring             | 5.7  | Sahani et al. <sup>217</sup>        |
|                             |  |           | Hong Kong Golf Course         | Monitoring             | 1.43 | Fung and Jim <sup>218</sup>         |
|                             |  |           | Hong Kong Golf Course         | Monitoring             | 4.2  | Fung and Jim <sup>219</sup>         |
|                             |  |           | Ejina basin                   | Monitoring & Modelling | 1.28 | Yonghong et al. <sup>220</sup>      |
|                             |  |           | Baoji Botanical Garden        | Monitoring             | 2.7  | Chang and Li <sup>221</sup>         |
|                             |  |           | Beijing, China                | Monitoring             | 1.32 | Liu et al. <sup>222</sup>           |

|                    |  |                    |                                          |                        |      |                                  |
|--------------------|--|--------------------|------------------------------------------|------------------------|------|----------------------------------|
|                    |  |                    | Xi'an, China                             | Remote Sensing         | 4.32 | Ma et al. <sup>223</sup>         |
|                    |  |                    | Hong Kong                                | Monitoring             | 2.9  | Fung and Jim <sup>224</sup>      |
|                    |  | Grass (other)      | Sydney, Australia                        | Monitoring             | 2.94 | Adams and Smith <sup>225</sup>   |
|                    |  | Shrubland (other)  | Howard Valley, South Island, New Zealand | Monitoring             | 3    | Callard et al. <sup>226</sup>    |
| Mixed (Green-Blue) |  | Mixed (Green-Blue) | Olympic Forest Park, Beijing, China      | Monitoring             | 0.4  | Amani-Beni et al. <sup>227</sup> |
|                    |  |                    | Beijing, China                           | Remote Sensing         | 1.32 | Liu et al. <sup>228</sup>        |
|                    |  |                    | Nagpur, Maharashtra                      | Remote Sensing         | 3.6  | Jain et al. <sup>229</sup>       |
|                    |  |                    | Igapó Lak, Latin American city           | Monitoring             | 2.63 | Targino et al. <sup>230</sup>    |
|                    |  |                    | Beijing, China                           | Monitoring & Modelling | 0.4  | Cheung and Jim <sup>231</sup>    |
|                    |  |                    | Olympic Area, Beijing, China             | Remote Sensing         | 4.95 | Dai et al. <sup>232</sup>        |



328 **Table S7.** The average performance of different types of GBGI categories, which were  
 329 evaluated using in-situ, modelling, in-situ combined modelling, and remote sensing  
 330 techniques for heat risk adaptation and mitigations. The '-' symbol indicates 'no data  
 331 available'.

| GBGI                      | GBGI Category        | Monitoring $\Delta T$ ( $^{\circ}C$ ) | Modelling $\Delta T$ ( $^{\circ}C$ ) | RS $\Delta T$ ( $^{\circ}C$ ) | MM $\Delta T$ ( $^{\circ}C$ ) | Overall $\Delta T$ ( $^{\circ}C$ ) | Availability |
|---------------------------|----------------------|---------------------------------------|--------------------------------------|-------------------------------|-------------------------------|------------------------------------|--------------|
| Gardens                   | Balcony              | 2.0                                   | 6.1                                  | -                             | -                             | 4.06                               | Medium       |
|                           | Private garden       | 2.3                                   | -                                    | -                             | -                             | 2.30                               | Very low     |
|                           | Irrigating backyard  | -                                     | 2.7                                  | 3.7                           | -                             | 3.20                               | Very low     |
| Parks                     | Pocket Park          | 1.4                                   | 2.9                                  | 4.1                           | 0.28                          | 2.16                               | Medium       |
|                           | Park                 | 3.0                                   | 0.8                                  | -                             | 2.38                          | 2.07                               | Very High    |
|                           | Botanical garden     | 5.6                                   | -                                    | -                             | 2.2                           | 3.90                               | Low          |
| Amenity areas             | Sports field         | -                                     | -                                    | -                             | 3.1                           | 3.10                               | Very low     |
|                           | Playground           | 3.0                                   | -                                    | 2.8                           | -                             | 2.90                               | Very low     |
|                           | Golf course          | -                                     | -                                    | 5.0                           | -                             | 5.00                               | Very low     |
|                           | Shared open space    | -                                     | 2.1                                  | -                             | -                             | 2.10                               | Very low     |
| Other public space        | Cemetery             | 1.7                                   | -                                    | -                             | -                             | 1.70                               | Very low     |
|                           | Allotment            | -                                     | -                                    | 4.0                           | -                             | 4.00                               | Very low     |
|                           | City farm            | 3.9                                   | 3.0                                  | -                             | -                             | 3.45                               | Very low     |
|                           | Adopted public space | -                                     | 2.3                                  | -                             | 3                             | 2.63                               | Very low     |
| Linear GI features/routes | Street tree          | 2.8                                   | 4.3                                  | 7.6                           | 1.45                          | 4.05                               | Very High    |
|                           | Road verge           | 2.1                                   | 2.0                                  | -                             | 0.05                          | 1.39                               | Low          |

|                                  |                    |     |     |      |      |      |           |
|----------------------------------|--------------------|-----|-----|------|------|------|-----------|
|                                  | Riparian woodland  | 2.1 | -   | 5.4  | -    | 3.76 | Low       |
|                                  | Hedge              | -   | 2.9 | 7.0  | 1.29 | 3.73 | Low       |
| Constructed GI on infrastructure | Green roof         | 3.9 | 0.5 | 0.9  | 0.4  | 1.43 | Very High |
|                                  | Green wall         | 4.7 | 1.5 | 12.6 | 2    | 5.21 | Very High |
|                                  | Roof garden        | 2.1 | 0.3 | 7.1  | -    | 3.13 | Medium    |
|                                  | Pergola            | 1.7 | -   | 18.2 | 2.65 | 7.50 | Low       |
| Hybrid GI (for water)            | Permeable paving   | 3.8 | 0.6 | -    | -    | 2.22 | Low       |
|                                  | Attenuation pond   | 7.0 | -   | -    | -    | 7.00 | Very low  |
|                                  | Rain garden        | 6.1 | 1.3 | -    | -    | 3.70 | Very low  |
| Waterbodies                      | Wetland            | 3.1 | 2.3 | 6.7  | -    | 4.05 | High      |
|                                  | Lake               | 3.1 | 0.8 | 2.8  | -    | 2.22 | Low       |
|                                  | Reservoir          | 2.9 | -   | -    | -    | 2.94 | Very low  |
|                                  | Sea (incl. coast)  | 1.4 | 0.4 | -    | 1.7  | 1.17 | Low       |
| Other non-sealed urban areas     | Woodland (other)   | 3.1 | -   | 4.3  | 1.28 | 2.89 | Medium    |
|                                  | Grass (other)      | 2.9 | -   | -    | -    | 2.94 | Very low  |
|                                  | Shrubland (other)  | 3.0 | -   | -    | -    | 3.00 | Very low  |
| Mixed (Green-Blue)               | Mixed (Green-Blue) | 1.5 | -   | 3.3  | 0.4  | 1.74 | Low       |

333 **Table S8.** The projected influence of future climate change on the choice of GBGI in various  
 334 climate zones.

| Climate zone       | Previous/Curent climate | Future climate | Present GBGI                                                                            | Future GBGI                                                           |
|--------------------|-------------------------|----------------|-----------------------------------------------------------------------------------------|-----------------------------------------------------------------------|
| Continent          | Dfa                     | Dfb            | Street trees<br>Permeable paving                                                        | Wetland                                                               |
|                    | Dfb                     | BSk            | Botanical garden                                                                        | Green wall<br>Street trees                                            |
| Dry                | BSk                     | BSh            | Balcony                                                                                 | Green wall, street trees                                              |
|                    | BSk                     | BWk            | Wetland                                                                                 | Woodland                                                              |
| Temperate (Europe) | Cfb                     | Cfa            | Green roofs,<br>Green walls,<br>Woodland<br>Reservoir<br>City farm<br>Riparian woodland | Parks<br>Pocket parks<br>Green walls<br>Green roofs<br>Lakes<br>Grass |
|                    | Dfb                     | Cfa            | Green roof<br>Balcony<br>Road verge<br>Playground                                       | Parks<br>Pocket parks<br>Green walls<br>Green roofs<br>Lakes<br>Grass |
| Temperate (China)  | Cwa                     | Am             | Park<br>Green wall<br>Green roof<br>Rain garden                                         | Lakes<br>Road verge                                                   |
|                    | Dwa                     | Cwa            | Woodland<br>Lake<br>Green roof<br>Road verge<br>Pergola<br>Roof garden                  | Green roof<br>Adopted space<br>wetland                                |

335  
 336  
 337

338 **Table 9.** Summary of key stages and action points for implementing, replicating, and  
 339 upscaling GBGI to mitigate urban heat.

| Stages                                                       | Action points                                                                                                                                                                                                                                                                                                                                                                                                                                                                                                                                                                                                                            |
|--------------------------------------------------------------|------------------------------------------------------------------------------------------------------------------------------------------------------------------------------------------------------------------------------------------------------------------------------------------------------------------------------------------------------------------------------------------------------------------------------------------------------------------------------------------------------------------------------------------------------------------------------------------------------------------------------------------|
| Stakeholder engagement <sup>a</sup>                          | <ul style="list-style-type: none"> <li>● Engage stakeholders early on, and from various sectors such as urban planning, public health, environmental agencies, and community organisations to identify and frame the heat risk problem and understand their concerns and priorities.</li> <li>● Foster collaboration and participatory decision-making processes to ensure diverse perspectives are considered.</li> <li>● Conduct workshops, interviews, and surveys to gather input and feedback from stakeholders.</li> <li>● Involve residents, local businesses, and community groups to increase awareness and support.</li> </ul> |
| Feasibility study of                                         | <ul style="list-style-type: none"> <li>● Conduct a preliminary cost-benefit analysis to assess the feasibility and potential effectiveness of different GBGI measures.</li> </ul>                                                                                                                                                                                                                                                                                                                                                                                                                                                        |
| GBGI <sup>b</sup>                                            | <ul style="list-style-type: none"> <li>● Consider factors such as implementation costs, maintenance requirements, technical feasibility, and expected benefits in terms of heat reduction and other co-benefits.</li> <li>● Identify suitable locations for implementation based on the analysis of UHI intensity and vulnerability maps/zones.</li> <li>● Explore funding options and potential partnerships to support implementation.</li> </ul>                                                                                                                                                                                      |
| Assess co-benefits and dis-benefits of the GBGI <sup>c</sup> | <ul style="list-style-type: none"> <li>● Consider the multiple co-benefits associated with GBGI, such as improved air quality, reduced stormwater runoff, enhanced biodiversity, and increased recreational opportunities.</li> <li>● Assess potential dis-benefits, such as increased maintenance requirements, potential conflicts with existing infrastructure, allergic reactions, and displacement of vulnerable populations due to gentrification.</li> <li>● Conduct a comprehensive cost-benefit analysis to evaluate the overall value and trade-offs of implementing GBGI.</li> </ul>                                          |

|                                         |                                                                                                                                                                                                                                                                                                                                                                                                                                                                                                                                                                                                                                                                  |
|-----------------------------------------|------------------------------------------------------------------------------------------------------------------------------------------------------------------------------------------------------------------------------------------------------------------------------------------------------------------------------------------------------------------------------------------------------------------------------------------------------------------------------------------------------------------------------------------------------------------------------------------------------------------------------------------------------------------|
| Design<br>GBGI<br>measures <sup>d</sup> | <ul style="list-style-type: none"> <li>● Select suitable GBGI measures based on the local context, including the climate, topography, available space, and community preferences.</li> <li>● Incorporate GBGI elements such as trees, green roofs, green walls, and permeable surfaces to maximise shade, evapotranspiration, and cooling effects.</li> <li>● Consider the use of native and drought-tolerant plant species for long-term sustainability and reduced water demand.</li> <li>● Ensure proper placement and spacing of vegetation to optimise shading and air movement.</li> </ul>                                                                 |
| Policy and<br>planning <sup>e</sup>     | <ul style="list-style-type: none"> <li>● Integrate GBGI strategies into urban planning and policy frameworks, such as comprehensive plans, zoning ordinances, and building codes.</li> <li>● Develop heat mitigation plans that prioritise the implementation of GBGI measures in high-risk areas.</li> <li>● Provide incentives, regulations, and guidelines to encourage the adoption of GBGI in private and public developments.</li> <li>● Collaborate with relevant organisations to ensure coordination and alignment of policies, goals, and levelling up of sustainability agenda (e.g., SDGs, European Green Deal, Paris Climate Agreement).</li> </ul> |
| Implementat<br>ion <sup>f</sup>         | <ul style="list-style-type: none"> <li>● Establish partnerships and collaborations between governmental agencies, private sector organisations, and community groups for effective implementation.</li> <li>● Allocate sufficient resources, including funding, staff, and technical expertise, for the installation and maintenance of the selected GBGI measures.</li> <li>● Ensure proper construction practices and quality control to maximise the performance and longevity of implemented measures.</li> <li>● Incorporate community engagement and education programs to foster stewardship and long-term support for the solutions in place.</li> </ul> |

|                                        |                                                                                                                                                                                                                                                                                                                                                                                                                                                                                                                                                                                                                                                              |
|----------------------------------------|--------------------------------------------------------------------------------------------------------------------------------------------------------------------------------------------------------------------------------------------------------------------------------------------------------------------------------------------------------------------------------------------------------------------------------------------------------------------------------------------------------------------------------------------------------------------------------------------------------------------------------------------------------------|
| Monitoring <sup>g</sup>                | <ul style="list-style-type: none"> <li>● Utilise relevant or a combination of in-situ measurements, remote sensing, and modelling methods to monitor the performance and effectiveness of GBGI used against heatwaves.</li> <li>● Deploy and use weather stations, sensors, and satellite imagery to evaluate the efficacy of the GBGI measures.</li> <li>● Collect data on temperature, humidity, air quality, and vegetation health to evaluate the impact of implemented measures.</li> <li>● Employ modelling tools to simulate the cooling effects and assess potential future scenarios.</li> </ul>                                                    |
| Evaluation <sup>h</sup>                | <ul style="list-style-type: none"> <li>● Conduct a comprehensive evaluation of the implemented GBGI measures to assess their effectiveness and cost-effectiveness.</li> <li>● Compare the heat risk before and after implementation using temperature data, health indicators, and energy consumption.</li> <li>● Analyse the economic, social, and environmental benefits achieved through the implementation of GBGI.</li> <li>● Incorporate feedback from stakeholders and learn from the implementation process to inform future improvements.</li> </ul>                                                                                                |
| Upscaling and replication <sup>i</sup> | <ul style="list-style-type: none"> <li>● Develop strategies for upscaling and replicating successful GBGI measures in different neighbourhoods and cities.</li> <li>● Share successful case studies and best practices to encourage replication in other areas and facilitate upscaling of GBGI measures.</li> <li>● Adapt the GBGI approach to suit local contexts, considering factors like climate, social dynamics, and available resources.</li> <li>● Develop training programs and capacity-building initiatives to support the replication and upscaling of GBGI measures.</li> <li>● Foster knowledge exchange among cities and regions.</li> </ul> |

340 <sup>a</sup>Sherman and Ford<sup>233</sup>; <sup>b</sup>O'Brien et al.<sup>234</sup>; <sup>c</sup>Coutts et al.<sup>235</sup>; <sup>d</sup>Curt et al.<sup>236</sup>; <sup>e</sup>Ommer et al.<sup>237</sup>; <sup>f</sup>Dumitru et  
341 al.<sup>238</sup>; <sup>g</sup>Kumar et al.<sup>239</sup>; <sup>h</sup>Davies et al.<sup>240</sup>; <sup>i</sup>European Green Deal<sup>241</sup>; <sup>j</sup>Di Pirro et al.<sup>242</sup>; <sup>k</sup>Topal et al.<sup>243</sup>;  
342 <sup>l</sup>Augusto et al.<sup>244</sup>; <sup>m</sup>Frantzeskaki<sup>245</sup>; <sup>n</sup>Cortinovis et al.<sup>246</sup>.

343  
344  
345

346 **References**

- 347 1. Mell, I., Allin, S., Reimer, M., & Wilker, J. (2017). Strategic green infrastructure  
348 planning in Germany and the UK: a transnational evaluation of the evolution of urban  
349 greening policy and practice. *International Planning Studies* 22, 333–349.
- 350 2. Wright, H. (2011). Understanding green infrastructure: the development of a contested  
351 concept in England. *Local Environment* 16, 1003-1019.
- 352 3. Byrne, J.A., Lo, A.Y., & Jianjun, Y. (2015). Residents' understanding of the role of  
353 green infrastructure for climate change adaptation in Hangzhou, China. *Landscape and  
354 urban planning* 138, 132-143.
- 355 4. Jones, L., Anderson, S., Læssøe, J., Banzhaf, E., Jensen, A., Bird, D.N., Miller, J.,  
356 Hutchins, M.G., Yang, J., Garrett, J., & Taylor, T. (2022). A typology for urban green  
357 infrastructure to guide multifunctional planning of nature-based solutions. *Nature-  
358 Based Solutions* 2, 100041.
- 359 5. Debele, S.E., Kumar, P., Sahani, J., Marti-Cardona, B., Mickovski, S.B., Leo, L.S.,  
360 Porcù, F., Bertini, F., Montesi, D., Vojinovic, Z., & Di Sabatino, S. (2019). Nature-  
361 based solutions for hydro-meteorological hazards: Revised concepts, classification  
362 schemes and databases. *Environmental Research* 179, 108799.
- 363 6. Cheung, P.K., Jim, C.Y., Tapper, N., Nice, K.A., & Livesley, S.J. (2022). Daytime  
364 irrigation leads to significantly cooler private backyards in summer. *Urban Climate* 46,  
365 101310.
- 366 7. Castellar, J.A., Popartan, L.A., Pueyo-Ros, J., Atanasova, N., Langergraber, G.,  
367 Säumel, I., Corominas, L., Comas, J., & Acuna, V. (2021). Nature-based solutions in  
368 the urban context: Terminology, classification and scoring for urban challenges and  
369 ecosystem services. *Science of the Total Environment* 779, 146237.
- 370 8. Demuzere, M., Orru, K., Heidrich, O., Olazabal, E., Geneletti, D., Orru, H., Bhave,  
371 A.G., Mittal, N., Feliú, E., & Faehnle, M. (2014). Mitigating and adapting to climate  
372 change: Multi-functional and multi-scale assessment of green urban infrastructure.  
373 *Journal of Environmental Management* 146, 107-115.
- 374 9. Rogers, C.D.F., & Hunt, D.V.L. (2019). Realising Visions for Future Cities: An  
375 Aspirational Futures Methodology. *Proceedings of the Institution of Civil Engineers –  
376 Urban Design and Planning* 172, 125-140.
- 377 10. Moher, D., Liberati, A., Tetzlaff, J., & Altman, D.G. (2009). Preferred reporting items  
378 for systematic reviews and meta-analyses: the PRISMA statement. *Annals of Internal  
379 Medicine* 151, 264-269.
- 380 11. R Core Team (2022). R: A language and environment for statistical computing. R  
381 Foundation for Statistical Computing, Vienna, Austria. URL [https://www.R-  
382 project.org/](https://www.R-project.org/).
- 383 12. Mazziotta, M., & Pareto, A. (2022). Normalization methods for spatio-temporal  
384 analysis of environmental performance: Revisiting the Min–Max method.  
385 *Environmetrics* 33, e2730.
- 386 13. Cai, Y., Li, C., Ye, L., Xiao, L., Gao, X., Mo, L., Du, H., Zhou, Y., & Zhou, G. (2022).  
387 Effect of the roadside tree canopy structure and the surrounding on the daytime urban  
388 air temperature in summer. *Agricultural and Forest Meteorology* 316, 108850.
- 389 14. Morabito, M., Crisci, A., Guerri, G., Messeri, A., Congedo, L. & Munafò, M. (2021).  
390 Surface urban heat islands in Italian metropolitan cities: Tree cover and impervious  
391 surface influences. *Science of the Total Environment* 751, 142334.
- 392 15. Xi, C., Wang, D., & Cao, S.J. (2023). Impacts of trees-grass area ratio on thermal  
393 environment, energy saving, and carbon benefits. *Urban Climate* 47, 101393.

- 394 16. Windbourne, J., Jones, T., Garvey, S., Harrison, J., Wang, L., Li, D., Templer, P., &  
395 Hutyra, L. (2020). Tree Transpiration and Urban Temperatures: Current Understanding,  
396 Implications, and Future Research Directions. *BioScience* 70, 576–588.
- 397 17. Lu, J., Li, Q., Zeng, L., Chen, J., Liu, G., Li, Y., Li, W., & Huang, K. (2017). A micro-  
398 climatic study on cooling effect of an urban park in a hot and humid climate.  
399 *Sustainable cities and society* 32, 513-522.
- 400 18. Chibuike, E.M., Ibukun, A.O., Abbas, A., & Kunda, J.J. (2018). Assessment of green  
401 parks cooling effect on Abuja urban microclimate using geospatial techniques. *Remote*  
402 *Sensing Applications: Society and Environment* 11, 11-21.
- 403 19. Peng, J., Dan, Y., Qiao, R., Liu, Y., Dong, J., & Wu, J. (2021). How to quantify the  
404 cooling effect of urban parks? Linking maximum and accumulation perspectives.  
405 *Remote Sensing of Environment* 252, 112135.
- 406 20. Gunawardena, K.R., Wells, M.J., & Kershaw, T. (2017). Utilising green and bluespace  
407 to mitigate urban heat island intensity. *Science of the Total Environment* 584, 1040-  
408 1055.
- 409 21. Lynn, B.H. & Lynn, I.M. (2020). The impact of cool and green roofs on summertime  
410 temperatures in the cities of Jerusalem and Tel Aviv. *Science of the Total Environment*  
411 743, 140568.
- 412 22. Iaria, J., & Susca, T. (2022). Analytic Hierarchy Processes (AHP) evaluation of green  
413 roof-and green wall-based UHI mitigation strategies via ENVI-met simulations. *Urban*  
414 *Climate* 46, 101293.
- 415 23. Li, H., Zhao, Y., Sützl, B., Kubilay, A., & Carmeliet, J. (2022). Impact of green walls  
416 on ventilation and heat removal from street canyons: Coupling of thermal and  
417 aerodynamic resistance. *Building and Environment* 214, 108945.
- 418 24. Feitosa, R.C., & Wilkinson, S.J. (2020). Small-scale experiments of seasonal heat stress  
419 attenuation through a combination of green roof and green walls. *Journal of Cleaner*  
420 *Production* 250, 119443.
- 421 25. Sun, R., Chen, A., Chen, L., & Lü, Y. (2012). Cooling effects of wetlands in an urban  
422 region: The case of Beijing. *Ecological Indicators* 20, 57-64.
- 423 26. Zhang, Z., Chen, F., Barlage, M., Bortolotti, L.E., Famiglietti, J., Li, Z., Ma, X., & Li,  
424 Y. (2022). Cooling Effects Revealed by Modeling of Wetlands and Land-Atmosphere  
425 Interactions. *Water Resources Research* 58, e2021WR030573.
- 426 27. Ampatzidis, P., & Kershaw, T. (2020). A review of the impact of blue space on the  
427 urban microclimate. *Science of the Total Environment* 730, 139068.
- 428 28. Hathway, E.A., & Sharples, S. (2012). The interaction of rivers and urban form in  
429 mitigating the Urban Heat Island effect: A UK case study. *Building and Environment*  
430 58, 14-22.
- 431 29. Wu, C., Li, J., Wang, C., Song, C., Chen, Y., Finka, M., & La Rosa, D. (2019).  
432 Understanding the relationship between urban blue infrastructure and land surface  
433 temperature. *Science of the Total Environment* 694, 133742.
- 434 30. Wu, S., Yang, H., Luo, P., Luo, C., Li, H., Liu, M., Ruan, Y., Zhang, S., Xiang, P., Jia,  
435 H., & Cheng, Y. (2021). The effects of the cooling efficiency of urban wetlands in an  
436 inland megacity: A case study of Chengdu, Southwest China. *Building and*  
437 *Environment* 204, 108128.
- 438 31. Teichmann, F., Horvath, A., Luisser, M., & Korjenic, A. (2022). The Impact of Small-  
439 Scale Greening on the Local Microclimate—A Case Study at Two School Buildings in  
440 Vienna. *Sustainability* 14, 13089.



- 441 32. Toe, D. H. C., & Kubota, T. (2015). Comparative assessment of vernacular passive  
442 cooling techniques for improving indoor thermal comfort of modern terraced houses in  
443 hot-humid climate of Malaysia. *Solar Energy* 114, 229–258.
- 444 33. Aghasizadeh, S., Kari, B. M., & Fayaz, R. (2022). Thermal performance of balcony  
445 thermal bridge solutions in reinforced concrete and steel frame structures. *Journal of*  
446 *Building Engineering* 48, 103984.
- 447 34. Cui, Y., & Zheng, H.-C. (2016). Impact of Three-Dimensional Greening of Buildings in  
448 Cold Regions in China on Urban Cooling Effect. *Procedia Engineering* 169, 297–302.
- 449 35. Grudzińska, M. (2021). Overheating assessment in flats with glazed balconies in warm-  
450 summer humid continental climate. *Building Services Engineering Research and*  
451 *Technology* 42, 583–602.
- 452 36. Hilliaho, K., Köliö, A., Pakkala, T., Lahdensivu, J., Vinha, J. (2016). Effects of added  
453 glazing on Balcony indoor temperatures: Field measurements. *Energy and Buildings*  
454 128, 458-472.
- 455 37. Grudzińska, M., 2021. Overheating assessment in flats with glazed balconies in warm-  
456 summer humid continental climate. *Building Services Engineering Research and*  
457 *Technology* 42, 583-602.
- 458 38. Cheung, P. K., Jim, C. Y., Tapper, N., Nice, K. A., & Livesley, S. J. (2022). Daytime  
459 irrigation leads to significantly cooler private backyards in summer. *Urban Climate* 46,  
460 101310.
- 461 39. Gao, K., Santamouris, M., & Feng, J. (2020). On the cooling potential of irrigation to  
462 mitigate urban heat island. *Science of the Total Environment* 740, 139754.
- 463 40. Broadbent, A. M., Coutts, A. M., Tapper, N. J., & Demuzere, M. (2018). The cooling  
464 effect of irrigation on urban microclimate during heatwave conditions. *Urban Climate*  
465 23, 309–329.
- 466 41. Wang, C., Wang, Z.-H., & Yang, J. (2019). Urban water capacity: Irrigation for heat  
467 mitigation. *Computers, Environment and Urban Systems* 78, 101397.
- 468 42. Lau, S. S., Lin, P., & Qin, H. (2012). A preliminary study on environmental  
469 performances of pocket parks in high-rise and high-density urban context in Hong  
470 Kong. *International Journal of Low-Carbon Technologies* 7, 215–225.
- 471 43. Lin, P., Lau, S. S. Y., Qin, H., & Gou, Z. (2017). Effects of urban planning indicators  
472 on urban heat island: a case study of pocket parks in high-rise high-density  
473 environment. *Landscape and Urban Planning* 168, 48–60.
- 474 44. Rosso, F., Pioppi, B., & Pisello, A. L. (2022). Pocket parks for human-centered urban  
475 climate change resilience: Microclimate field tests and multi-domain comfort analysis  
476 through portable sensing techniques and citizens' science. *Energy and Buildings* 260,  
477 111918.
- 478 45. Trájer, A. J., Sebestyén, V., Domokos, E., & Abonyi, J. (2022). Indicators for climate  
479 change-driven urban health impact assessment. *Journal of Environmental Management*  
480 323, 116165.
- 481 46. Hou, J., Wang, Y., Zhou, D., & Gao, Z. (2022). Environmental Effects from Pocket  
482 Park Design According to District Planning Patterns—Cases from Xi'an, China.  
483 *Atmosphere* 13, 300.
- 484 47. Ma, D., Wang, Y., Zhou, D., & Zhu, Z. (2023). Cooling effect of the pocket park in the  
485 built-up block of a city: a case study in Xi'an, China. *Environmental Science and*  
486 *Pollution Research* 30, 23135–23154.

- 487 48. Wu, C., Li, J., Wang, C., Song, C., Haase, D., Breuste, J., & Finka, M. (2021).  
488 Estimating the Cooling Effect of Pocket Green Space in High Density Urban Areas in  
489 Shanghai, China. *Frontiers in Environmental Science* 9, 657969.
- 490 49. Ibrahim, M. S. (2021). Mitigation strategies of the urban heat island over Greater Cairo  
491 Metropolitan Area, Egypt utilizing ENVI-met model. *Catrina: The International Journal*  
492 *of Environmental Sciences* 24, 35-47.
- 493 50. Huang, J., Hao, T., Wang, Y., & Jones, P. (2022). A street-scale simulation model for  
494 the cooling performance of urban greenery: Evidence from a high-density city.  
495 *Sustainable Cities and Society* 82, 103908.
- 496 51. Lu, J., Li, Q., Zeng, L., Chen, J., Liu, G., Li, Y., Li, W., & Huang, K. (2017). A micro-  
497 climatic study on cooling effect of an urban park in a hot and humid climate.  
498 *Sustainable Cities and Society* 32, 513–522.
- 499 52. Chibuike, E. M., Ibukun, A. O., Abbas, A., & Kunda, J. J. (2018). Assessment of green  
500 parks cooling effect on Abuja urban microclimate using geospatial techniques. *Remote*  
501 *Sensing Applications: Society and Environment* 11, 11–21.
- 502 53. Zhang, Z., Lv, Y., & Pan, H. (2013). Cooling and humidifying effect of plant  
503 communities in subtropical urban parks. *Urban Forestry & Urban Greening* 12, 323–  
504 329.
- 505 54. Shi, M., Chen, M., Jia, W., Du, C., & Wang, Y. (2023). Cooling effect and cooling  
506 accessibility of urban parks during hot summers in China’s largest sustainability  
507 experiment. *Sustainable Cities and Society* 93, 104519.
- 508 55. Du, C., Jia, W., Chen, M., Yan, L., & Wang, K. (2022). How can urban parks be  
509 planned to maximize cooling effect in hot extremes? Linking maximum and  
510 accumulative perspectives. *Journal of Environmental Management* 317, 115346.
- 511 56. Peng, J., Dan, Y., Qiao, R., Liu, Y., Dong, J., & Wu, J. (2021). How to quantify the  
512 cooling effect of urban parks? Linking maximum and accumulation perspectives.  
513 *Remote Sensing of Environment* 252, 112135.
- 514 57. Yang, A.-S., Juan, Y.-H., Wen, C.-Y., & Chang, C.-J. (2017). Numerical simulation of  
515 cooling effect of vegetation enhancement in a subtropical urban park. *Applied Energy*  
516 192, 178–200.
- 517 58. Chen, M., Jia, W., Yan, L., Du, C., & Wang, K. (2022). Quantification and mapping  
518 cooling effect and its accessibility of urban parks in an extreme heat event in a  
519 megacity. *Journal of Cleaner Production* 334, 130252.
- 520 59. Das, M., Das, A., & Momin, S. (2022). Quantifying the cooling effect of urban green  
521 space: A case from urban parks in a tropical mega metropolitan area (India).  
522 *Sustainable Cities and Society* 87, 104062.
- 523 60. Zhou, Y., Zhao, H., Mao, S., Zhang, G., Jin, Y., Luo, Y., Huo, W., Pan, Z., An, P., &  
524 Lun, F. (2022). Studies on urban park cooling effects and their driving factors in China:  
525 Considering 276 cities under different climate zones. *Building and Environment* 222,  
526 109441.
- 527 61. Algetawee, H. (2022). The effect of graduated urban park size on park cooling island  
528 and distance relative to land surface temperature (LST). *Urban Climate* 45, 101255.
- 529 62. Qiu, K., & Jia, B. (2020). The roles of landscape both inside the park and the  
530 surroundings in park cooling effect. *Sustainable Cities and Society* 52, 101864.
- 531 63. Li, Y., Fan, S., Li, K., Zhang, Y., Kong, L., Xie, Y., & Dong, L. (2021). Large urban  
532 parks summertime cool and wet island intensity and its influencing factors in Beijing,  
533 China. *Urban Forestry and Urban Greening* 65.

- 534 64. Gao, Z., Zaitchik, B. F., Hou, Y., & Chen, W. (2022). Toward park design optimization  
535 to mitigate the urban heat Island: Assessment of the cooling effect in five U.S. cities.  
536 *Sustainable Cities and Society* 81, 103870.
- 537 65. Yang, A.S., Juan, Y.H., Wen, C.Y., Chang, C.J. (2017). Numerical simulation of  
538 cooling effect of vegetation enhancement in a subtropical urban park. *Applied energy*  
539 192, 178-200.
- 540 66. Şimşek, Ç. K., Serter, G., & Ödül, H. (2022). A Study on the Cooling Capacities of  
541 Urban Parks and Their Interactions with the Surrounding Urban Patterns. *Applied*  
542 *Spatial Analysis and Policy* 15, 1287–1317.
- 543 67. Li, Y., Fan, S., Li, K., Zhang, Y., & Dong, L. (2021). Microclimate in an urban park  
544 and its influencing factors: a case study of Tiantan Park in Beijing, China. *Urban*  
545 *Ecosystems* 24, 767-778.
- 546 68. Cheung, P. K., Jim, C. Y., & Siu, C. T. (2021). Effects of urban park design features on  
547 summer air temperature and humidity in compact-city milieu. *Applied Geography* 129,  
548 102439.
- 549 69. Algretawee, H., Rayburg, S., & Neave, M. (2019). Estimating the effect of park  
550 proximity to the central of Melbourne city on Urban Heat Island (UHI) relative to Land  
551 Surface Temperature (LST). *Ecological Engineering* 138, 374–390.
- 552 70. Yan, H., Wu, F., & Dong, L. (2018). Influence of a large urban park on the local urban  
553 thermal environment. *Science of the Total Environment* 662, 882–891.
- 554 71. Chang, N., & Li, D. W. (2016). A study of the temperature-humidity effect and  
555 luminous environment design for urban green space. *Chemical Engineering*  
556 *Transactions* 51, 103–108.
- 557 72. Irmak, M. A., Yilmaz, S., & Dursun, D. (2017). Effect of different pavements on  
558 human thermal comfort conditions. *Atmósfera* 30, 355–366.
- 559 73. Su, X. (2018). Study on Humidification and Cooling Effect of Garden Plants. 4th  
560 International Conference on Education, Management and Information Technology  
561 (ICEMIT 2018).
- 562 74. Yilmaz, S., Mutlu, E., & Yilmaz, H. (2018). Alternative scenarios for ecological  
563 urbanizations using ENVI-met model. *Environmental Science and Pollution Research*  
564 25, 26307–26321.
- 565 75. Yilmaz, S., Irmak, M. A., & Qaid, A. (2022). Assessing the effects of different urban  
566 landscapes and built environment patterns on thermal comfort and air pollution in  
567 Erzurum city, Turkey. *Building and Environment* 219, 109210.
- 568 76. Ghani, S., ElBialy, E. A., Bakochristou, F., Gamaledin, S. M. A., Rashwan, M. M., &  
569 Hughes, B. (2017). Thermal performance of stadium's Field of Play in hot climates.  
570 *Energy and Buildings* 139, 702–718.
- 571 77. Kuchcik, M., Dudek, W., Błażejczyk, K., Milewski, P., & Błażejczyk, A. (2016). Two  
572 faces to the greenery on housing estates—mitigating climate but aggravating allergy. A  
573 Warsaw case study. *Urban Forestry & Urban Greening* 16, 170–181.
- 574 78. Vanos, J. K., Middel, A., McKercher, G. R., Kuras, E. R., & Ruddell, B. L. (2016). Hot  
575 playgrounds and children's health: A multiscale analysis of surface temperatures in  
576 Arizona, USA. *Landscape and Urban Planning* 146, 29–42.
- 577 79. Nguyen, T. T., Eslick, H., Barber, P., Harper, R., & Dell, B. (2022). Cooling effects of  
578 urban vegetation: The role of golf courses. *Remote Sensing* 14, 4351.
- 579 80. Zölch, T., Maderspacher, J., Wamsler, C., & Pauleit, S. (2016). Using green  
580 infrastructure for urban climate-proofing: An evaluation of heat mitigation measures at  
581 the micro-scale. *Urban Forestry & Urban Greening* 20, 305–316.

- 582 81. Sallay, Á., Mikházi, Z., Gecséné Tar, I., & Takács, K. (2022). Cemeteries as a Part of  
583 Green Infrastructure and Tourism. *Sustainability* 14, 2918.
- 584 82. Rost, A. T., Liste, V., Seidel, C., Matscheroth, L., Otto, M., Meier, F., & Fenner, D.  
585 (2020). How cool are allotment gardens? A case study of nocturnal air temperature  
586 differences in Berlin, Germany. *Atmosphere* 11, 500.
- 587 83. Hawkins, T. W., Brazel, A. J., Stefanov, W. L., Bigler, W., & Saffell, E. M. (2004).  
588 The role of rural variability in urban heat island determination for Phoenix, Arizona.  
589 *Journal of Applied Meteorology and Climatology* 43, 476-486.
- 590 84. Masson, V., Lion, Y., Peter, A., Pigeon, G., Buyck, J., & Brun, E. (2013). “Grand  
591 Paris”: regional landscape change to adapt city to climate warming. *Climatic*  
592 *Change* 117, 769-782.
- 593 85. Basu, T., & Das, A. (2023). Urbanization induced degradation of urban green space and  
594 its association to the land surface temperature in a medium-class city in India.  
595 *Sustainable Cities and Society* 90, 104373.
- 596 86. Boeri, A. N. D. R. E. A., Gaspari, J. A. C. O. P. O., Gianfrate, V. A. L. E. N. T. I. N.  
597 A., & Longo, D. A. N. I. L. A. (2017). Accelerating urban transition: An approach to  
598 greening the built environment. *WIT Transactions on Ecology and the*  
599 *Environment* 223, 3-14.
- 600 87. Abdollahzadeh, N., & Biloría, N. (2021). Outdoor thermal comfort: Analyzing the  
601 impact of urban configurations on the thermal performance of street canyons in the  
602 humid subtropical climate of Sydney. *Frontiers of Architectural Research* 10, 394-409.
- 603 88. Cai, Y., Li, C., Ye, L., Xiao, L., Gao, X., Mo, L., Du, H., Zhou, Y., & Zhou, G. (2022).  
604 Effect of the roadside tree canopy structure and the surrounding on the daytime urban  
605 air temperature in summer. *Agricultural and Forest Meteorology* 316, 108850.
- 606 89. Morabito, M., Crisci, A., Guerri, G., Messeri, A., Congedo, L., & Munafò, M. (2021).  
607 Surface urban heat islands in Italian metropolitan cities: Tree cover and impervious  
608 surface influences. *Science of The Total Environment* 751, 142334.
- 609 90. Napoli, M., Massetti, L., Brandani, G., Petralli, M., & Orlandini, S. (2016). Modeling  
610 Tree Shade Effect on Urban Ground Surface Temperature. *Journal of Environmental*  
611 *Quality* 45, 146-156.
- 612 91. Xi, C., Wang, D., & Cao, S.-J. (2023). Impacts of trees-grass area ratio on thermal  
613 environment, energy saving, and carbon benefits. *Urban Climate* 47, 101393.
- 614 92. Zeeshan, M., Ali, Z., Sajid, M., Ali, M., & Usman, M. (2022). Modelling the cooling  
615 effectiveness of street trees with actual canopy drag and real transpiration rate under  
616 representative climatic conditions. *Journal of Building Performance Simulation*, 1-14.
- 617 93. Abu Ali, M., Alawadi, K., & Khanal, A. (2021). The role of green infrastructure in  
618 enhancing microclimate conditions: A case study of a low-rise neighborhood in Abu  
619 Dhabi. *Sustainability* 13, 4260.
- 620 94. Marando, F., Salvatori, E., Sebastiani, A., Fusaro, L., & Manes, F. (2019). Regulating  
621 Ecosystem Services and Green Infrastructure: assessment of Urban Heat Island effect  
622 mitigation in the municipality of Rome, Italy. *Ecological Modelling* 392, 92-102.
- 623 95. Zeeshan, M., Ali, Z., Ud Din, E. (2023). Thermal performance prediction of street trees  
624 inside isolated open spaces—evaluations from real scale retrofitting project. *Journal of*  
625 *Building Performance Simulation* 16, 381-397.
- 626 96. Wang, Y., & Akbari, H. (2016). The effects of street tree planting on Urban Heat Island  
627 mitigation in Montreal. *Sustainable Cities and Society* 27, 122-128.

- 628 97. Lachapelle, J. A., Scott Krayenhoff, E., Middel, A., Coseo, P., & Warland, J. (2023).  
629 Maximizing the pedestrian radiative cooling benefit per street tree. *Landscape and*  
630 *Urban Planning* 230, 104608.
- 631 98. Segura, R., Krayenhoff, E. S., Martilli, A., Badia, A., Estruch, C., Ventura, S., &  
632 Villalba, G. (2022). How do street trees affect urban temperatures and radiation  
633 exchange? Observations and numerical evaluation in a highly compact city. *Urban*  
634 *Climate* 46, 101288.
- 635 99. Miao, C., Li, P., Huang, Y., Sun, Y., Chen, W., & Yu, S. (2023). Coupling outdoor air  
636 quality with thermal comfort in the presence of street trees: a pilot investigation in  
637 Shenyang, Northeast China. *Journal of Forestry Research* 34, 831-839.
- 638 100. Geletič, J., Lehnert, M., Resler, J., Krč, P., Middel, A., Krayenhoff, E. S., & Krüger, E.  
639 (2022). High-fidelity simulation of the effects of street trees, green roofs and green  
640 walls on the distribution of thermal exposure in Prague-Dejvice. *Building and*  
641 *Environment* 223, 109484.
- 642 101. Mussetti, G., Brunner, D., Henne, S., Allegrini, J., Scott Krayenhoff, E., Schubert, S.,  
643 Feigenwinter, C., Vogt, R., Wicki, A., & Carmeliet, J. (2020). COSMO-BEP-Tree v1.0:  
644 A coupled urban climate model with explicit representation of street trees.  
645 *Geoscientific Model Development* 13, 1685–1710.
- 646 102. Vailshery, L. S., Jaganmohan, M., & Nagendra, H. (2013). Effect of street trees on  
647 microclimate and air pollution in a tropical city. *Urban Forestry & Urban Greening* 12,  
648 408–415.
- 649 103. Gillner, S., Vogt, J., Tharang, A., Dettmann, S., & Roloff, A. (2015). Role of street  
650 trees in mitigating effects of heat and drought at highly sealed urban sites. *Landscape*  
651 *and Urban Planning* 143, 33–42.
- 652 104. Coutts, A. M., White, E. C., Tapper, N. J., Beringer, J., & Livesley, S. J. (2016).  
653 Temperature and human thermal comfort effects of street trees across three contrasting  
654 street canyon environments. *Theoretical and Applied Climatology* 124, 55–68.
- 655 105. Sanusi, R., Johnstone, D., May, P., & Livesley, S. J. (2016). Street Orientation and Side  
656 of the Street Greatly Influence the Microclimatic Benefits Street Trees Can Provide in  
657 Summer. *Journal of Environmental Quality* 45, 167–174.
- 658 106. Aminipouri, M., Knudby, A. J., Krayenhoff, E. S., Zickfeld, K., & Middel, A. (2019).  
659 Modelling the impact of increased street tree cover on mean radiant temperature across  
660 Vancouver’s local climate zones. *Urban Forestry & Urban Greening* 39, 9–17.
- 661 107. Kusaka, H., Nakamura, Y., & Asano, Y. (2022). UV Parasol, Dry-Mist Spraying, and  
662 Street Trees as Tools for Heat Stress Mitigation. *Journal of the Meteorological Society*  
663 *of Japan. Ser. II* 100, 677–685.
- 664 108. Cho, H. (2022). Effects of Road Components and Roadside Vegetation on Temperature  
665 Reduction in Seoul Considering Air, Wet-Bulb Globe, and Surface Temperatures.  
666 *Sustainability* 14, 16663.
- 667 109. Huang, K. T., & Li, Y. J. (2017). Impact of street canyon typology on building’s peak  
668 cooling energy demand: A parametric analysis using orthogonal experiment. *Energy*  
669 *and Buildings* 154, 448-464.
- 670 110. Stojanovic, N., Vasiljevic, N., Mešicek, M., & Lisica, A. (2018). The influence of  
671 roadside green spaces on thermal conditions in the urban environment. *Journal of*  
672 *Architectural and Planning Research* 35, 165-178.
- 673 111. Zaki, S. A., Toh, H. J., Yakub, F., Mohd Saudi, A. S., Ardila-Rey, J. A., &  
674 Muhammad-Sukki, F. (2020). Effects of roadside trees and road orientation on thermal  
675 environment in a tropical city. *Sustainability* 12, 1053.

- 676 112. Zheng, X., Chen, L., & Yang, J. (2023). Simulation framework for early design  
677 guidance of urban streets to improve outdoor thermal comfort and building energy  
678 efficiency in summer. *Building and Environment* 228, 109815.
- 679 113. Žižlavská, N., Mikita, T., & Patočka, Z. (2021). The Effects of Roadside Woody  
680 Vegetation on the Surface Temperature of Cycle Paths. *Land* 10, 483.
- 681 114. Adams, M. P., & Smith, P. L. (2014). A systematic approach to model the influence of  
682 the type and density of vegetation cover on urban heat using remote sensing. *Landscape  
683 and Urban Planning* 132, 47-54.
- 684 115. Yonghong, S., Fandi, L., Gaofeng, Z., Zhang, K., & Qi, Z. (2023). The biophysical  
685 climate mitigation potential of riparian forest ecosystems in arid Northwest China.  
686 *Science of The Total Environment* 862, 160856.
- 687 116. Tsai, C. W., Young, T., Warren, P. H., & Maltby, L. (2017). Riparian thermal  
688 conditions across a mixed rural and urban landscape. *Applied geography* 87, 106-114.
- 689 117. Dugdale, S.J., Malcolm, I.A., Hannah, D.M. (2019). Drone-based Structure-from-  
690 Motion provides accurate forest canopy data to assess shading effects in river  
691 temperature models. *Science of the Total Environment* 678, 326-340.
- 692 118. Zheng, X., Zhang, N., & Wang, X. (2022). Development of a modified thermal  
693 humidity index and its application to human thermal comfort of urban vegetation  
694 patches. *Ecosystem Health and Sustainability* 8, 2130095.
- 695 119. Zhang, J., & Hu, D. (2022). Research of practical heat mitigation strategies in a  
696 residential district of Beijing, North China. *Urban Climate* 46, 101314.
- 697 120. Peluso, P., Persichetti, G., & Moretti, L. (2022). Effectiveness of Road Cool  
698 Pavements, Greenery, and Canopies to Reduce the Urban Heat Island Effects.  
699 *Sustainability* 14, 16027.
- 700 121. Del Serrone, G., Peluso, P., & Moretti, L. (2022). Evaluation of Microclimate Benefits  
701 Due to Cool Pavements and Green Infrastructures on Urban Heat Islands. *Atmosphere*  
702 13, 1586.
- 703 122. Zou, Z., Yang, Y., Qiu, G. Y. (2019). Quantifying the evapotranspiration rate and its  
704 cooling effects of urban hedges based on three-temperature model and infrared remote  
705 sensing. *Remote Sensing* 11, 202.
- 706 123. Yoshida, A., Hayashi, D., Shimazaki, Y., & Kinoshita, S. (2019). Evaluation of thermal  
707 sensation in various outdoor radiation environments. *Architectural Science Review* 62,  
708 261–270.
- 709 124. Wang, X., Li, H., & Sodoudi, S. (2022). The effectiveness of cool and green roofs in  
710 mitigating urban heat island and improving human thermal comfort. *Building and  
711 Environment* 217, 109082.
- 712 125. Cortes, A., Rejuso, A. J., Santos, J. A., & Blanco, A. (2022). Evaluating mitigation  
713 strategies for urban heat island in Mandaue City using ENVI-met. *Journal of Urban  
714 Management* 11, 97–106.
- 715 126. Fleck, R., Gill, R. L., Saadeh, S., Pettit, T., Wooster, E., Torpy, F., & Irga, P. (2022).  
716 Urban green roofs to manage rooftop microclimates: A case study from Sydney,  
717 Australia. *Building and Environment* 209, 108673.
- 718 127. Dong, J., Lin, M., Zuo, J., Lin, T., Liu, J., Sun, C., & Luo, J. (2020). Quantitative study  
719 on the cooling effect of green roofs in a high-density urban Area—A case study of  
720 Xiamen, China. *Journal of Cleaner Production* 255, 120152.
- 721 128. Kostadinović, D., Jovanović, M., Bakić, V., Štepanić, N., & Todorović, M. (2022).  
722 Experimental investigation of summer thermal performance of the green roof system  
723 with mineral wool substrate. *Building and Environment* 217, 109061.

- 724 129. Peng, L. L. H., Yang, X., He, Y., Hu, Z., Xu, T., Jiang, Z., & Yao, L. (2019). Thermal  
725 and energy performance of two distinct green roofs: Temporal pattern and underlying  
726 factors in a subtropical climate. *Energy and Buildings* 185, 247–258.
- 727 130. Lee, L. S. H., & Jim, C. Y. (2019). Urban woodland on intensive green roof improved  
728 outdoor thermal comfort in subtropical summer. *International Journal of*  
729 *Biometeorology* 63, 895–909.
- 730 131. Köhler, M., & Kaiser, D. (2019). Evidence of the climate mitigation effect of green  
731 roofs-A 20-year weather study on an Extensive Green Roof (EGR) in Northeast  
732 Germany. *Buildings* 9, 157.
- 733 132. Park, J., Kim, J.-H., Dvorak, B., & Lee, D. K. (2018). The role of green roofs on  
734 microclimate mitigation effect to local climates in summer. *International Journal of*  
735 *Environmental Research* 12, 671–679.
- 736 133. Lynn, B. H., & Lynn, I. M. (2020). The impact of cool and green roofs on summertime  
737 temperatures in the cities of Jerusalem and Tel Aviv. *Science of The Total Environment*  
738 743, 140568.
- 739 134. Chen, X., Jeong, S., Zheng, Y., Park, H., Park, C. E., Joo, J., Choi, W., Chen, X., &  
740 Zheng, C. (2020). Evaluation of Different Roof Materials for the Mitigation of Urban  
741 Warming in a Subtropical Monsoon Climate. *Journal of Geophysical Research:*  
742 *Atmospheres* 125, e2019JD031972.
- 743 135. Cortes, A., Rejuso, A. J., Santos, J. A., & Blanco, A. (2022). Evaluating mitigation  
744 strategies for urban heat island in Mandaue City using ENVI-met. *Journal of Urban*  
745 *Management* 11, 97–106.
- 746 136. Solcerova, A., van de Ven, F., Wang, M., Rijdsdijk, M., & van de Giesen, N. (2017). Do  
747 green roofs cool the air? *Building and Environment* 111, 249–255.
- 748 137. Bochenek, A. D., & Klemm, K. (2020). The impact of passive green technologies on  
749 the microclimate of historic urban structures: The case study of Lodz. *Atmosphere* 11,  
750 974.
- 751 138. Chen, B., Wang, W., You, Y., Zhu, W., Dong, Y., Xu, Y., Chang, M., & Wang, X.  
752 (2023). Influence of rooftop mitigation strategies on the thermal environment in a  
753 subtropical city. *Urban Climate* 49, 101450.
- 754 139. Elnabawi, M. H., & Saber, E. (2023). A numerical study of cool and green roof  
755 strategies on indoor energy saving and outdoor cooling impact at pedestrian level in a  
756 hot arid climate. *Journal of Building Performance Simulation* 16, 72–89.
- 757 140. Zuo, J., Ma, J., Lin, T., Dong, J., Lin, M., & Luo, J. (2022). Quantitative valuation of  
758 green roofs' cooling effects under different urban spatial forms in high-density urban  
759 areas. *Building and Environment* 222, 109367.
- 760 141. Iaria, J., & Susca, T. (2022). Analytic Hierarchy Processes (AHP) evaluation of green  
761 roof- and green wall-based UHI mitigation strategies via ENVI-met simulations. *Urban*  
762 *Climate* 46, 101293.
- 763 142. Fleck, R., Gill, R. L., Saadeh, S., Pettit, T., Wooster, E., Torpy, F., & Irga, P. (2022).  
764 Urban green roofs to manage rooftop microclimates: A case study from Sydney,  
765 Australia. *Building and Environment* 209, 108673.
- 766 143. Robbiati, F. O., Cáceres, N., Hick, E. C., Suarez, M., Soto, S., Barea, G., Matoff, E.,  
767 Galetto, L., & Imhof, L. (2022). Vegetative and thermal performance of an extensive  
768 vegetated roof located in the urban heat island of a semiarid region. *Building and*  
769 *Environment* 212, 108791.

- 770 144. Liao, J., Tan, X., & Li, J. (2021). Evaluating the vertical cooling performances of urban  
771 vegetation scenarios in a residential environment. *Journal of Building Engineering* 39,  
772 102313.
- 773 145. Cameron, R. W., Taylor, J. E., & Emmett, M. R. (2014). What's 'cool' in the world of  
774 green façades? How plant choice influences the cooling properties of green walls.  
775 *Building and environment* 73, 198-207.
- 776 146. Zhang, L., Deng, Z., Liang, L., Zhang, Y., Meng, Q., Wang, J., & Santamouris, M.  
777 (2019). Thermal behavior of a vertical green facade and its impact on the indoor and  
778 outdoor thermal environment. *Energy and Buildings* 204, 109502.
- 779 147. Liu, Y., Huang, Y., Zhang, Z., Wang, K., Luo, Y., & Cui, P. (2022). Impacts of green  
780 walls on the characteristics of thermo-flow and photochemical reaction kinetics within  
781 street canyons. *Urban Forestry & Urban Greening* 72, 127568.
- 782 148. Cameron, R. W., Taylor, J., & Emmett, M. (2015). A Hedera green façade–energy  
783 performance and saving under different maritime-temperate, winter weather conditions.  
784 *Building and Environment* 92, 111-121.
- 785 149. Jesus, M. P., Lourenço, J. M., Arce, R. M., & Macias, M. (2017). Green façades and in  
786 situ measurements of outdoor building thermal behaviour. *Building and Environment*  
787 119, 11–19.
- 788 150. Lee, L. S. H, & Jim, C. Y. (2017). Subtropical summer thermal effects of wire-rope  
789 climber green walls with different air-gap depths. *Building and Environment* 126, 1-12.
- 790 151. Feitosa, R.C., Wilkinson, S.J. (2018). Attenuating heat stress through green roof and  
791 green wall retrofit. *Building and Environment* 140, 11-22.
- 792 152. Li, H., Zhao, Y., Sützl, B., Kubilay, A., & Carmeliet, J. (2022). Impact of green walls  
793 on ventilation and heat removal from street canyons: Coupling of thermal and  
794 aerodynamic resistance. *Building and Environment* 214, 108945.
- 795 153. Geletič, J., Lehnert, M., Resler, J., Krč, P., Middel, A., Krayenhoff, E.S. and Krüger, E.  
796 (2022). High-fidelity simulation of the effects of street trees, green roofs and green  
797 walls on the distribution of thermal exposure in Prague-Dejvice. *Building and*  
798 *Environment* 223, 109484.
- 799 154. Šuklje, T., Medved, S., & Arkar, C. (2016). On detailed thermal response modeling of  
800 vertical greenery systems as cooling measure for buildings and cities in summer  
801 conditions. *Energy* 115, 1055-1068.
- 802 155. Medl, A., Mayr, S., Rauch, H. P., Weihs, P., & Florineth, F. (2017). Microclimatic  
803 conditions of 'Green Walls', a new restoration technique for steep slopes based on a  
804 steel grid construction. *Ecological engineering* 101, 39-45.
- 805 156. Feitosa, R. C., & Wilkinson, S. J. (2020). Small-scale experiments of seasonal heat  
806 stress attenuation through a combination of green roof and green walls. *Journal of*  
807 *Cleaner Production* 250, 119443.
- 808 157. Blanco, I., Schettini, E., & Vox, G. (2019). Predictive model of surface temperature  
809 difference between green façades and uncovered wall in Mediterranean climatic area.  
810 *Applied Thermal Engineering* 163, 114406.
- 811 158. Bakhshoodeh, R., Ocampo, C., & Oldham, C. (2022). Exploring the evapotranspirative  
812 cooling effect of a green façade. *Sustainable Cities and Society* 81, 103822.
- 813 159. Davis, M. M., Vallejo Espinosa, A. L., & Ramirez, F. R. (2019). Beyond green façades:  
814 active air-cooling vertical gardens. *Smart and Sustainable Built Environment* 8, 243-  
815 252.



- 816 160. Hosseinzadeh, A., Bottacin-Busolin, A., & Keshmiri, A. (2022). A parametric study on  
817 the effects of green roofs, green walls and trees on air quality, temperature and velocity.  
818 *Buildings* 12, 2159.
- 819 161. Djedjig, R., Bozonnet, E., & Belarbi, R. (2015). Experimental study of the urban  
820 microclimate mitigation potential of green roofs and green walls in street canyons.  
821 *International Journal of Low-Carbon Technologies* 10, 34-44.
- 822 162. Pragati, S., Shanthi Priya, R., Pradeepa, C., & Senthil, R. (2023). Simulation of the  
823 Energy Performance of a Building with Green Roofs and Green Walls in a Tropical  
824 Climate. *Sustainability* 15, 2006.
- 825 163. Lin, H., Xiao, Y., Musso, F., & Lu, Y. (2019). Green façade effects on thermal  
826 environment in transitional space: Field measurement studies and computational fluid  
827 dynamics simulations. *Sustainability* 11, 5691.
- 828 164. Price, A., Jones, E. C., & Jefferson, F. (2015). Vertical greenery systems as a strategy  
829 in urban heat island mitigation. *Water, Air, & Soil Pollution* 226, 1-11.
- 830 165. Lee, L. S. H., & Jim, C. Y. (2020). Multidimensional analysis of temporal and layered  
831 microclimatic behavior of subtropical climber green walls in summer. *Urban  
832 Ecosystems* 23, 389-402.
- 833 166. Lin, H., Musso, F., & Xiao, Y. (2018). Shading Effect and Heat Reflection of the Green  
834 Façade. *PLEA 2018: Smart and Healthy Within the Two-Degree Limit*, 931.
- 835 167. Li, J., Zheng, B., Shen, W., Xiang, Y., Chen, X., & Qi, Z. (2019). Cooling and energy-  
836 saving performance of different green wall design: A simulation study of a block.  
837 *Energies* 12, 2912.
- 838 168. Peng, L.L., Yang, X., He, Y., Hu, Z., Xu, T., Jiang, Z., Yao, L. (2019). Thermal and  
839 energy performance of two distinct green roofs: Temporal pattern and underlying  
840 factors in a subtropical climate. *Energy and Buildings* 185, 247-258.
- 841 169. Shen, Z. (2022). Green Roof Design of Residential Area Based on Sponge City Theory.  
842 *Wireless Communications and Mobile Computing*, 2022.
- 843 170. AbdulBaqi, F. K. (2022). The effect of afforestation and green roofs techniques on  
844 thermal reduction in Duhok city. *Trees, Forests and People* 8, 100267.
- 845 171. Kim, J., Lee, S. Y., & Kang, J. (2020). Temperature reduction effects of rooftop garden  
846 arrangements: A case study of Seoul National University. *Sustainability* 12, 6032.
- 847 172. Lee, L. S. H., & Jim, C. Y. (2018). Thermal-cooling performance of subtropical green  
848 roof with deep substrate and woodland vegetation. *Ecological Engineering* 119, 8–18.
- 849 173. Tan, C. L., Tan, P. Y., Wong, N. H., Takasuna, H., Kudo, T., Takemasa, Y., Lim, C. V.  
850 J., & Chua, H. X. V. (2017). Impact of soil and water retention characteristics on green  
851 roof thermal performance. *Energy and Buildings* 152, 830–842.
- 852 174. Tan, C. L., Wong, N. H., Jusuf, S. K., & Chiam, Z. Q. (2015). Impact of plant  
853 evapotranspiration rate and shrub albedo on temperature reduction in the tropical  
854 outdoor environment. *Building and Environment* 94, 206–217.
- 855 175. Watanabe, S., Nagano, K., Ishii, J., & Horikoshi, T. (2014). Evaluation of outdoor  
856 thermal comfort in sunlight, building shade, and pergola shade during summer in a  
857 humid subtropical region. *Building and Environment* 82, 556–565.
- 858 176. Katsoulas, N., Antoniadis, D., Tsirogiannis, I. L., Labraki, E., Bartzanas, T., & Kittas,  
859 C. (2017). Microclimatic effects of planted hydroponic structures in urban  
860 environment: measurements and simulations. *International Journal of Biometeorology*  
861 61, 943–956.

- 862 177. Chàfer, M., Pisello, A. L., Piselli, C., & Cabeza, L. F. (2020). Greenery system for  
863 cooling down outdoor spaces: Results of an experimental study. *Sustainability* 12,  
864 5888.
- 865 178. Kong, H., Choi, N., & Park, S. (2021). Thermal environment analysis of landscape  
866 parameters of an urban park in summer - A case study in Suwon, Republic of Korea.  
867 *Urban Forestry and Urban Greening* 65, 127377.
- 868 179. Teichmann, F., Horvath, A., Luissler, M. and Korjenic, A. (2022). The Impact of Small-  
869 Scale Greening on the Local Microclimate—A Case Study at Two School Buildings in  
870 Vienna. *Sustainability* 14, 13089.
- 871 180. Fini, A., Frangi, P., Mori, J., Donzelli, D., & Ferrini, F. (2017). Nature based solutions  
872 to mitigate soil sealing in urban areas: Results from a 4-year study comparing  
873 permeable, porous, and impermeable pavements. *Environmental research* 156, 443-454.
- 874 181. Kousis, I., Fabiani, C., & Pisello, A. L. (2022). Could a bio-resin and transparent  
875 pavement improve the urban environment? An in field thermo-optical investigation and  
876 life-cycle assessment. *Sustainable Cities and Society* 79, 103597.
- 877 182. Lu, R., Jiang, W., Xiao, J., Xing, C., Ruan, C., Li, Y., & Wu, W. (2022). Temperature  
878 characteristics of permeable asphalt pavement: Field research. *Construction and  
879 Building Materials* 332, 127379.
- 880 183. Moretti, L., Cantisani, G., Carpicci, M., D'Andrea, A., Del Serrone, G., Di Mascio, P.,  
881 & Loprencipe, G. (2021). Effect of sampietrini pavers on urban heat islands.  
882 *International journal of environmental research and public health* 18, 13108.
- 883 184. Wang, J., Meng, Q., Tan, K., Zhang, L., & Zhang, Y. (2018). Experimental  
884 investigation on the influence of evaporative cooling of permeable pavements on  
885 outdoor thermal environment. *Building and Environment* 140, 184-193.
- 886 185. Wang, X., Wang, X., Chen, Y., & Berlyn, G. P. (2019). Photosynthetic parameters of  
887 urban greening trees growing on paved land. *iForest-Biogeosciences and Forestry* 12,  
888 403.
- 889 186. Yang, W., Wang, Z., & Zhao, X. (2015). Experimental investigation of the thermal  
890 isolation and evaporative cooling effects of an exposed shallow-water-reserved roof  
891 under the sub-tropical climatic condition. *Sustainable Cities and Society* 14, 293-304.
- 892 187. An, K. J., Lam, Y. F., Hao, S., Morakinyo, T. E., & Furumai, H. (2015). Multi-purpose  
893 rainwater harvesting for water resource recovery and the cooling effect. *Water  
894 Research* 86, 116-121.
- 895 188. Buzzard, V., Gil-Loaiza, J., Grachet, N. G., Talkington, H., Youngerman, C., Tfaily, M.  
896 M., & Meredith, L. K. (2021). Green infrastructure influences soil health: biological  
897 divergence one year after installation. *Science of The Total Environment* 801, 149644.
- 898 189. Kasprzyk, M., Szpakowski, W., Poznańska, E., Boogaard, F. C., Bobkowska, K., &  
899 Gajewska, M. (2022). Technical solutions and benefits of introducing rain gardens—  
900 Gdańsk case study. *Science of The Total Environment* 835, 155487.
- 901 190. Bai, J., Lu, Q., Zhao, Q., Wang, J., & Ouyang, H. (2013). Effects of alpine wetland  
902 landscapes on regional climate on the Zoige Plateau of China. *Advances in  
903 Meteorology*, 2013.
- 904 191. Cai, Z., Guldman, J. M., Tang, Y., & Han, G. (2022). Does city-water layout matter?  
905 Comparing the cooling effects of water bodies across 34 Chinese megacities. *Journal of  
906 Environmental Management* 324, 116263.
- 907 192. Pucher, B., Zluwa, I., Spörl, P., Pitha, U., & Langergraber, G. (2022). Evaluation of the  
908 multifunctionality of a vertical greening system using different irrigation strategies on

- 909 cooling, plant development and greywater use. *Science of The Total Environment* 849,  
910 157842.
- 911 193. Ruiz-Aviles, V., Brazel, A., Davis, J. M., & Pijawka, D. (2020). Mitigation of urban  
912 heat island effects through “green infrastructure”: integrated design of constructed  
913 wetlands and neighborhood development. *Urban Science* 4, 78.
- 914 194. Shahjahan, A. T. M., Ahmed, K. S., & Said, I. B. (2020). Study on Riparian Shading  
915 Envelope for Wetlands to Create Desirable Urban Bioclimates. *Atmosphere* 11, 1348.
- 916 195. Şimşek, Ç. K., & Ödül, H. (2018). Investigation of the effects of wetlands on micro-  
917 climate. *Applied geography* 97, 48-60.
- 918 196. Sun, R., Chen, A., Chen, L., & Lü, Y. (2012). Cooling effects of wetlands in an urban  
919 region: The case of Beijing. *Ecological Indicators* 20, 57-64.
- 920 197. Sušnik, J., Masia, S., Kravčík, M., Pokorný, J., & Hesslerová, P. (2022). Costs and  
921 benefits of landscape-based water retention measures as nature-based solutions to  
922 mitigating climate impacts in eastern Germany, Czech Republic, and Slovakia. *Land*  
923 *Degradation & Development* 33, 3074-3087.
- 924 198. Triyuly, W., Triyadi, S., & Wonorahardjo, S. (2021). Synergising the thermal  
925 behaviour of water bodies within thermal environment of wetland settlements.  
926 *International Journal of Energy and Environmental Engineering* 12, 55-68.
- 927 199. Wu, S., Yang, H., Luo, P., Luo, C., Li, H., Liu, M., Ruan, Y., Zhang, S., Xiang, P., Jia,  
928 H., & Cheng, Y. (2021). The effects of the cooling efficiency of urban wetlands in an  
929 inland megacity: A case study of Chengdu, Southwest China. *Building and*  
930 *Environment* 204, 108128.
- 931 200. Xu, H., Chen, H., Zhou, X., Wu, Y., & Liu, Y. (2020). Research on the relationship  
932 between urban morphology and air temperature based on mobile measurement: A case  
933 study in Wuhan, China. *Urban Climate* 34, 100671.
- 934 201. Zhang, W., Jiang, J., & Zhu, Y. (2015). Change in urban wetlands and their cold island  
935 effects in response to rapid urbanization. *Chinese Geographical Science* 25, 462-471.
- 936 202. Wenguang, Z., Wenjuan, W., Guanglei, H., Chao, G., Ming, J., & Xianguo, L. (2020).  
937 Cooling effects of different wetlands in semi-arid rural region of Northeast China.  
938 *Theoretical and Applied Climatology* 141, 31-41.
- 939 203. Zhang, Z., Chen, F., Barlage, M., Bortolotti, L. E., Famiglietti, J., Li, Z., Ma, X., & Li,  
940 Y. (2022). Cooling effects revealed by modeling of wetlands and land-atmosphere  
941 interactions. *Water Resources Research* 58, e2021WR030573.
- 942 204. Sun, R., Chen, A., Chen, L., Lü, Y. (2012). Cooling effects of wetlands in an urban  
943 region: The case of Beijing. *Ecological Indicators* 20, 57-64.
- 944 205. Le Phuc, C. L., Nguyen, H. S., Dao Dinh, C., Tran, N. B., Pham, Q. B., & Nguyen, X.  
945 C. (2022). Cooling island effect of urban lakes in hot waves under foehn and climate  
946 change. *Theoretical and Applied Climatology* 149, 817-830.
- 947 206. Theeuwes, N. E., Solcerova, A., & Steeneveld, G. J. (2013). Modeling the influence of  
948 open water surfaces on the summertime temperature and thermal comfort in the city.  
949 *Journal of Geophysical Research: Atmospheres* 118, 8881-8896.
- 950 207. Xu, H., Chen, H., Zhou, X., Wu, Y., Liu, Y. (2020). Research on the relationship  
951 between urban morphology and air temperature based on mobile measurement: A case  
952 study in Wuhan, China. *Urban Climate* 34, 100671.
- 953 208. Yang, S. J., Ran, G. P., Zhang, W., & Wang, Z. H. (2020). The cooling effect of an  
954 urban lake landscape on the urban heat island: a case study in Jinan, China. *Applied*  
955 *Ecology & Environmental Research* 18, 2197-2211.

- 956 209. Masiero, É., & de Souza, L. C. L. (2016). Improving urban thermal profile with trees  
957 and water features. *Proceedings of the Institution of Civil Engineers-Urban Design and*  
958 *Planning* 169, 66-77.
- 959 210. Novo, A. V., Bayon, J. R., Castro-Fresno, D., & Rodriguez-Hernandez, J. (2013).  
960 Temperature performance of different pervious pavements: rainwater harvesting for  
961 energy recovery purposes. *Water resources management* 27, 5003-5016.
- 962 211. Novo, A. V., Bayon, J. R., Castro-Fresno, D., & Rodriguez-Hernandez, J. (2013).  
963 Monitoring and evaluation of the thermal behavior of permeable pavements for energy  
964 recovery purposes in an experimental parking lot: Preliminary results. *Journal of*  
965 *Energy Engineering* 139, 230-237.
- 966 212. Dandou, A., Papangelis, G., Kontos, T., Santamouris, M., & Tombrou, M. (2021). On  
967 the cooling potential of urban heating mitigation technologies in a coastal temperate  
968 city. *Landscape and Urban Planning* 212, 104106.
- 969 213. Zhou, X., Okaze, T., Ren, C., Cai, M., Ishida, Y., Watanabe, H., & Mochida, A. (2020).  
970 Evaluation of urban heat islands using local climate zones and the influence of sea-land  
971 breeze. *Sustainable Cities and Society* 55, 102060.
- 972 214. Zhou, Y., Guan, H., Gharib, S., Batelaan, O., & Simmons, C. T. (2021). Cooling power  
973 of sea breezes and its inland penetration in dry-summer Adelaide, Australia.  
974 *Atmospheric Research* 250, 105409.
- 975 215. Zhou, Y., Guan, H., Huang, C., Fan, L., Gharib, S., Batelaan, O., & Simmons, C.  
976 (2019). Sea breeze cooling capacity and its influencing factors in a coastal city.  
977 *Building and Environment* 166, 106408.
- 978 216. Zhu, D., Zhou, X., & Cheng, W. (2022). Water effects on urban heat islands in summer  
979 using WRF-UCM with gridded urban canopy parameters — A case study of Wuhan.  
980 *Building and Environment* 225, 109528.
- 981 217. Sahani, J., P, Kumar., SE., Debele. (2023). Efficacy assessment of green-blue nature-  
982 based solutions against environmental heat mitigation. *Environment International*.  
983 Under review.
- 984 218. Fung, C. K., & Jim, C. Y. (2017). Assessing the cooling effects of different vegetation  
985 settings in a Hong Kong golf course. *Procedia Environmental Sciences* 37, 626-636.
- 986 219. Fung, C. K., & Jim, C. Y. (2019). Microclimatic resilience of subtropical woodlands  
987 and urban-forest benefits. *Urban Forestry & Urban Greening* 42, 100-112.
- 988 220. Yonghong, S., Fandi, L., Gaofeng, Z., Zhang, K., Qi, Z. (2023). The biophysical  
989 climate mitigation potential of riparian forest ecosystems in arid Northwest China.  
990 *Science of The Total Environment* 862, 160856.
- 991 221. Chang, N., Li, D.W. (2016). A study of the temperature-humidity effect and luminous  
992 environment design for urban green space. *Chemical Engineering Transactions* 51, 103-  
993 108.
- 994 222. Liu, W., Zhao, H., Sun, S., Xu, X., Huang, T., & Zhu, J. (2022). Green space cooling  
995 effect and contribution to mitigate heat island effect of surrounding communities in  
996 Beijing metropolitan area. *Frontiers in Public Health* 10, 870403.
- 997 223. Ma, Y., Zhao, M., Li, J., Wang, J., & Hu, L. (2021). Cooling effect of different land  
998 cover types: a case study in Xi'an and Xianyang, China. *Sustainability* 13, 1099.
- 999 224. Fung, C.K., Jim, C.Y. (2017). Assessing the cooling effects of different vegetation  
1000 settings in a Hong Kong golf course. *Procedia Environmental Sciences* 37, 626-636.
- 1001 225. Adams, M.P., Smith, P.L. (2014). A systematic approach to model the influence of the  
1002 type and density of vegetation cover on urban heat using remote sensing. *Landscape*  
1003 *and Urban Planning* 132, 47-54.

- 1004 226. Callard, S. L., Newnham, R. M., Vandergoes, M. J., Alloway, B. V., & Smith, C.  
1005 (2013). The vegetation and climate during the Last Glacial cold period, northern South  
1006 Island, New Zealand. *Quaternary Science Reviews* 74, 230-244.
- 1007 227. Amani-Beni, M., Zhang, B., Xie, G. D., & Shi, Y. (2019). Impacts of urban green  
1008 landscape patterns on land surface temperature: Evidence from the adjacent area of  
1009 Olympic Forest Park of Beijing, China. *Sustainability* 11, 513.
- 1010 228. Liu, W., Zhao, H., Sun, S., Xu, X., Huang, T., Zhu, J. (2022). Green space cooling  
1011 effect and contribution to mitigate heat island effect of surrounding communities in  
1012 Beijing metropolitan area. *Frontiers in Public Health* 10, 870403.
- 1013 229. Jain, S., Sannigrahi, S., Sen, S., Bhatt, S., Chakraborti, S., & Rahmat, S. (2020). Urban  
1014 heat island intensity and its mitigation strategies in the fast-growing urban area. *Journal*  
1015 *of Urban Management* 9, 54-66.
- 1016 230. Targino, A. C., Coraiola, G. C., & Krecl, P. (2019). Green or blue spaces? Assessment  
1017 of the effectiveness and costs to mitigate the urban heat island in a Latin American city.  
1018 *Theoretical and Applied Climatology* 136, 971-984.
- 1019 231. Cheung, P. K., & Jim, C. Y. (2019). Differential cooling effects of landscape  
1020 parameters in humid-subtropical urban parks. *Landscape and urban planning* 192,  
1021 103651.
- 1022 232. Dai, Z., Guldmann, J. M., & Hu, Y. (2019). Thermal impacts of greenery, water, and  
1023 impervious structures in Beijing's Olympic area: A spatial regression approach.  
1024 *Ecological indicators* 97, 77-88.
- 1025 233. Sherman, M.H., & Ford, J. (2014). Stakeholder engagement in adaptation interventions:  
1026 an evaluation of projects in developing nations. *Climate Policy* 14, 417-441.
- 1027 234. O'Brien, R.M., Phelan, T.J., Smith, N.M., & Smits, K.M. (2021). Remediation in  
1028 developing countries: A review of previously implemented projects and analysis of  
1029 stakeholder participation efforts. *Critical Reviews in Environmental Science and*  
1030 *Technology* 51, 1259-1280.
- 1031 235. Coutts, J., White, T., Blackett, P., Rijswijk, K., Bewsell, D., Park, N., Turner, J.A., &  
1032 Botha, N. (2017). Evaluating a space for co-innovation: Practical application of nine  
1033 principles for co-innovation in five innovation projects. *Outlook on Agriculture* 46, 99-  
1034 107.
- 1035 236. Curt, C., Di Maiolo, P., Schleyer-Lindenmann, A., Tricot, A., Arnaud, A., Curt, T.,  
1036 Parès, N., & Taillandier, F. (2022). Assessing the environmental and social co-benefits  
1037 and disbenefits of natural risk management measures. *Heliyon* 8, e12465.
- 1038 237. Ommer, J., Bucchignani, E., Leo, L.S., Kalas, M., Vranić, S., Debele, S., Kumar, P.,  
1039 Cloke, H.L. & Di Sabatino, S. (2022). Quantifying co-benefits and disbenefits of  
1040 Nature-based Solutions targeting Disaster Risk Reduction. *International Journal of*  
1041 *Disaster Risk Reduction* 75, 102966.
- 1042 238. Dumitru, A., Frantzeskaki, N., & Collier, M. (2020). Identifying principles for the  
1043 design of robust impact evaluation frameworks for nature-based solutions in cities.  
1044 *Environmental Science & Policy* 112, 107-116.
- 1045 239. Kumar, P., Debele, S. E., Sahani, J., Rawat, N., Marti-Cardona, B., Alfieri, S. M., Basu,  
1046 B., Basu, A. S., Bowyer, P., Charizopoulos, N., Gallotti, G., Jaakko, J., Leo, L. S.,  
1047 Loupis, M., Menenti, M., Mickovski, S. B., Mun, S.-J., Gonzalez-Ollauri, A., Pfeiffer,  
1048 J., Pilla, F., Proll, J., Rutzinger, M., Santo, M. A., Sannigrahi, S., Spyrou, C.,  
1049 Tuomenvirta, H., & Zieher, T. (2021a). Nature-based solutions efficiency evaluation  
1050 against natural hazards: Modelling methods, advantages and limitations. *Science of The*  
1051 *Total Environment* 784, 147058.

- 1052 240. Davies, C., Chen, W.Y., Sanesi, G., & Laforteza, R. (2021). The European Union  
1053 roadmap for implementing nature-based solutions: A review. *Environmental Science &*  
1054 *Policy* 121, 49-67.
- 1055 241. European Green Deal (2021). The European Green Deal and cohesion policy. Available  
1056 at:  
1057 [https://www.europarl.europa.eu/RegData/etudes/BRIE/2021/698058/EPRS\\_BRI\(2021\)](https://www.europarl.europa.eu/RegData/etudes/BRIE/2021/698058/EPRS_BRI(2021)698058_EN.pdf)  
1058 [698058\\_EN.pdf](https://www.europarl.europa.eu/RegData/etudes/BRIE/2021/698058/EPRS_BRI(2021)698058_EN.pdf) (retrieved on 23 June 2023).
- 1059 242. Di Pirro, E., Sallustio, L., Sgrigna, G., Marchetti, M., & Lasserre, B. (2022).  
1060 Strengthening the implementation of national policy agenda in urban areas to face  
1061 multiple environmental stressors: Italy as a case study. *Environmental Science & Policy*  
1062 129, 1-11.
- 1063 243. Topal, H.F., Hunt, D.V.L., & Rogers, C.D.F. (2021). Exploring urban sustainability  
1064 understanding and behavior: A systematic review towards a conceptual framework.  
1065 *Sustainability* 13, 1139.
- 1066 244. Augusto, B., Roebeling, P., Rafael, S., Ferreira, J., Ascenso, A., & Bodilis, C. (2020).  
1067 Short and medium-to long-term impacts of nature-based solutions on urban heat.  
1068 *Sustainable Cities and Society* 57, 102122.
- 1069 245. Frantzeskaki, N. (2019). Seven lessons for planning nature-based solutions in cities.  
1070 *Environmental Science & Policy* 93, 101-111.
- 1071 246. Cortinovis, C., Olsson, P., Boke-Olén, N., & Hedlund, K. (2022). Scaling up nature-  
1072 based solutions for climate-change adaptation: Potential and benefits in three European  
1073 cities. *Urban Forestry & Urban Greening* 67, 127450.
